# Supplementary material for: National medical expenditures by smoking status in American adults: an application of Manning’s two-stage model to nationally representative data
Source: PubMed Central journal article supplement — BMJ Open. 2019 Jul 16;9(7):e026592. doi: 10.1136/bmjopen-2018-026592 (PMC6661572; doi:10.1136/bmjopen-2018-026592), 2019-07-16

# BMJ Open

BMJ Open is committed to open peer review. As part of this commitment we make the peer review history of every article we publish publicly available.

When an article is published we post the peer reviewers' comments and the authors' responses online. We also post the versions of the paper that were used during peer review. These are the versions that the peer review comments apply to.

The versions of the paper that follow are the versions that were submitted during the peer review process. They are not the versions of record or the final published versions. They should not be cited or distributed as the published version of this manuscript.

BMJ Open is an open access journal and the full, final, typeset and author-corrected version of record of the manuscript is available on our site with no access controls, subscription charges or pay-per-view fees (<http://bmjopen.bmj.com>).

If you have any questions on BMJ Open's open peer review process please email [info.bmjopen@bmj.com](mailto:info.bmjopen@bmj.com)

# BMJ Open

## Updating medical expenditures by smoking status in American adults

|                               |                                                                                                                                                                                                                                                                                                                                                                    |
|-------------------------------|--------------------------------------------------------------------------------------------------------------------------------------------------------------------------------------------------------------------------------------------------------------------------------------------------------------------------------------------------------------------|
| Journal:                      | <i>BMJ Open</i>                                                                                                                                                                                                                                                                                                                                                    |
| Manuscript ID                 | bmjopen-2018-026592                                                                                                                                                                                                                                                                                                                                                |
| Article Type:                 | Research                                                                                                                                                                                                                                                                                                                                                           |
| Date Submitted by the Author: | 12-Sep-2018                                                                                                                                                                                                                                                                                                                                                        |
| Complete List of Authors:     | Swedler, David; Pacific Institute for Research and Evaluation, Miller, Ted; Pacific Institute for Research and Evaluation; Curtin University - Perth City Campus<br>Ali, Bina; Pacific Institute for Research and Evaluation<br>Waeher, Geetha; Pacific Institute for Research and Evaluation<br>Bernstein, Steven L.; Yale School of Medicine, Emergency Medicine |
| Keywords:                     | HEALTH ECONOMICS, PUBLIC HEALTH, STATISTICS & RESEARCH METHODS                                                                                                                                                                                                                                                                                                     |
|                               |                                                                                                                                                                                                                                                                                                                                                                    |

SCHOLARONE™  
Manuscripts

## Updating medical expenditures by smoking status in American adults

David I. Swedler, PhD<sup>1</sup>

Ted R. Miller, PhD<sup>1,2</sup>

Bina Ali, PhD<sup>1</sup>

Geetha Waecher, PhD<sup>1</sup>

Steven L. Bernstein, MD<sup>3</sup>

<sup>1</sup> Pacific Institute for Research and Evaluation, Calverton, MD, USA

<sup>2</sup> Curtin University School of Public Health, Perth, Australia

<sup>3</sup> Department of Emergency Medicine, Yale School of Medicine; Department of Health Policy,  
Yale School of Public Health, New Haven, CT, USA

Corresponding Author: David Swedler  
Pacific Institute for Research and Evaluation  
11720 Beltsville Dr., Ste. 900  
Calverton, MD 20705, United States of America  
phone: 1-301-755-2446  
fax: 1-301-755-2799  
[dswedler@pire.org](mailto:dswedler@pire.org)

**Word Count:** 2693

**Reference Count:** 34

**Keywords:** economics; quit status; age effects; MEPS

## 1 **Abstract**

2 **Objectives:** To assess the medical expenditures of American adults by their smoking status-  
3 Current, Former, or Never smokers. We update these expenditures controlling for personal  
4 characteristics and medical history. The impact of years-since-quit and decade of life are also  
5 examined. **Setting and participants:** Weighted sample of American adults, 2011 – 2015. The  
6 National Health Interview Survey (NHIS) and Medical Expenditure Panel Survey (MEPS) are  
7 weighted representations of approximately 250 million adults, annually. Sampling of NHIS is  
8 multistage and data collected throughout the year. **Primary outcome measures:** Using data  
9 from NHIS and MEPS, we collected demographic data, self-reported medical history, and  
10 current smoking status. Smoking status was designated as Never, Current, and Former, along  
11 with years-since-quit. Total medical expenditures were collected from MEPS for 2011 –  
12 2015. We used Manning’s two-part model to model average expenditures per individual and  
13 marginal costs for individuals at all levels of smoking status. **Results:** American adults averaged  
14 \$4,830 in average medical expenditures. Never smokers (\$4,360, 95% CI = 4154.3 – 4566.3),  
15 had lower expenditures than Current (\$5,244, 95% CI = 4707.9 – 5580.3) and Former (\$5,590,  
16 95% CI = 5267.4 – 5913.5) smokers. Confidence intervals for Current and Former smokers  
17 overlapped. Results were similarly significant when controlling for disease history. Years-since-  
18 quitting did not affect expenditures. In each decade of adult life, Former smokers had the highest  
19 annual medical expenditures, followed by Current and Never smokers. **Conclusions:** We  
20 updated annual medical expenditures for the Obamacare-era for smoking status using the current  
21 best practice model. Former smokers had lower medical expenditures than Current smokers in all  
22 age groups. While we identify Former smokers as having higher medical expenditures than

1  
2  
3 1 Current smokers, we do not examine how care-seeking behavior varies between levels of each  
4  
5 2 risk factor.

7  
8 3 **Article Summary**

9  
10 4 *Strengths and Limitations*

- 11  
12 5 • This is also the first study to report data on medical expenditure by smoking status while  
13  
14 6 major provisions of the Affordable Care Act (a.k.a. Obamacare) were taking effect.  
15  
16 7 • We use the gold standard two-part model developed by Manning to estimate medical  
17  
18 8 expenditures from the MEPS and NHIS surveys.  
19  
20 9 • We separated medical expenditures for Ever Smokers into Current and Former smokers,  
21  
22 10 finding that the latter had slightly increased annual medical expenditures.  
23  
24 11 • Effects of smoking status were examined across decades of life.  
25  
26 12 • Although we controlled for history of comorbidities, the data do not contain any  
27  
28 13 information on reason-for-quitting among former smokers.  
29  
30  
31  
32  
33  
34  
35  
36  
37  
38  
39  
40  
41  
42  
43  
44  
45  
46  
47  
48  
49  
50  
51  
52  
53  
54  
55  
56  
57  
58  
59  
60

## 1 Introduction

2 It is well-established that smoking can lead to medical conditions requiring acute and chronic  
3 treatment[1]. Accurate marginal costs for medical risk factors are important when conducting  
4 benefit-cost analyses for health risk behavior interventions[2-4]. The most recent national  
5 estimates of medical expenditures by smoking status have only considered a binary smoking  
6 variable: current smokers versus current non-smokers[5, 6]. Further, none of these national  
7 studies have analyzed medical expenditure data more recently than 2011. A series of state-level  
8 analyses by Max and colleagues[7-9] described medical costs in California by current, former,  
9 and never smokers.

11 The California studies used the attributable fraction (AF) method to allocate medical  
12 expenditures. The accuracy of the AF method is constrained by how accurately costs are  
13 allocated among diagnoses and by the availability of accurate AFs that are not confounded by  
14 co-occurring risk factors[10]. The negative outcomes that smokers experience vary widely in  
15 nature and timing. Importantly, the method does not measure the standard error for the mean  
16 estimated cost per risk-taker[11].

18 In analyzing the costs of medical conditions, health economics literature has largely shifted from  
19 this AF method to analyses of annual per capita medical spending of people with the condition  
20 relative to a comparison group (*c.f.* Manning *et al* [12]). This approach captures both mean and  
21 standard error. It accounts for complications that may not be coded to the underlying condition.  
22 It recognizes that medical visits for conditions related to the behavioral risk factors may displace  
23 other medical care that might be sought if an individual did not have a given risk factor. For

1  
2  
3 1 example, a doctor who is scheduling quarterly visits to manage diabetes is unlikely to separately  
4  
5 2 schedule the annual well-care visit recommended for a healthier patient. That well-care visit gets  
6  
7 3 coded as a chronic care visit even though it may not raise annual medical spending[13].  
8  
9  
10 4

11  
12 5 While the Manning model is now the gold standard for working with skewed outcomes like  
13  
14 6 medical spending, it is an imperfect tool. Although it statistically assigns costs to given risk  
15  
16 7 factors or medical conditions, it does not tell us the “why” behind each individual medical  
17  
18 8 encounter or expense. Medical spending is influenced by care-seeking behavior. Smokers may  
19  
20 9 avoid visiting the doctor because it is uncomfortable to report their continued smoking behavior  
21  
22 10 or tedious to hear the doctor urge them to change[14]. Health consciousness and associated use  
23  
24 11 of preventive care may be below-average for people who engage in risky behavior. Furthermore,  
25  
26 12 drinking heavily may be a symptom of life management issues that reduce care-seeking. Those  
27  
28 13 differences in health management may mask the impacts of risk behavior on medical spending.  
29  
30  
31  
32  
33  
34

### 35 15 *Purpose*

36  
37 16 This study updates the national estimates for annual medical expenditures of adult Americans by  
38  
39 17 their current smoking status. We examine medical expenditure data for 2011 – 2015 and apply  
40  
41 18 the cutting-edge two-stage Manning model to more accurately assess error around mean  
42  
43 19 expenditures.  
44  
45  
46  
47 20

### 48 49 21 **Methods**

#### 50 51 22 *Data Collection*

52  
53  
54  
55  
56  
57  
58  
59  
60

1 We analyzed data on smoking status from the National Health Interview Survey (NHIS)[15]. The  
2 NHIS is an annual, cross-sectional survey designed to monitor health and behaviors of civilian,  
3 non-institutionalized Americans through a nationally-representative sample. The Medical  
4 Expenditure Panel Survey (MEPS) tracks a nationally representative subsample of NHIS  
5 participants for 24 months starting in the year after their NHIS interview. MEPS collects five  
6 rounds of data per respondent on healthcare visits and expenditures[16]. It captures all payments  
7 for care, regardless of source, and models costs for visits without payment data including charity  
8 care and visits bundled into capitated care. We used 2011-2015 MEPS data on total medical  
9 expenditures from the individual perspective for adults 18-years and older and the corresponding  
10 NHIS 2009 – 2014 data. We linked data from MEPS and NHIS via the Agency for Health Care  
11 Quality Data Center, as Xu *et al* and An did in their analyses of smoking costs[5, 6].

12  
13 Smoking status was identified through the NHIS Supplemental Adult Questionnaire (SAQ). Like  
14 earlier studies, we identified Ever smokers as participants who smoked at least 100 cigarettes in  
15 their lifetimes. We defined all others as Never smokers[6]. Ever smokers were further subdivided  
16 into those who reported quitting smoking, Former smokers, versus those who did not report  
17 quitting, Current smokers[7-9]. For Former smokers, we also identified years-since-quitting.

18  
19 To conduct regressions, we included the following demographic and behavioral characteristics:  
20 age, sex, race/ethnicity, marital status, education level, total family income, family size,  
21 employment status, marital status, self-reported binge drinking status, body mass index (BMI),  
22 recent pregnancy, educational, employment, and insurance data from MEPS. Age was employed  
23 as a continuous variable in the main analyses and divided into ten-year blocks in the age-specific



1 sensitivity analysis. Binge drinking data were also obtained from the SAQ, which used the  
2 accepted binge drinking definition of men having 5 or more drinks and women having 4 or more  
3 drinks. Those participants who indicated that they had 12 or more instances of binge drinking in  
4 the past year were categorized as frequent binge drinkers, and those who had 1-11 instances were  
5 categorized as infrequent binge drinkers. BMI data were calculated from self-reported weight  
6 and height in the NHIS. We dichotomized BMI into obese for those with a BMI of 30 kg/m<sup>2</sup> or  
7 greater, and not obese for those with lower BMI. We refer to these variables collectively as  
8 personal characteristics.

9  
10 NHIS and MEPS had data on self-reported diagnosis history for various diseases. Using data  
11 from both databases, we generated dichotomous variables for whether a participant had ever  
12 been diagnosed with the following diseases: asthma, arthritis, any cancer, cardiovascular diseases  
13 (including angina, coronary heart disease, myocardial infarction, or stroke), diabetes, and  
14 emphysema. NHIS had data on chronic obstructive pulmonary disease (COPD) available for  
15 2013 through 2015 MEPS panels. From MEPS, we obtained scores for the Short Form 12 to  
16 measure quality of life[17], the Personal Health Questionnaire (PHQ) metric for depression[18],  
17 and the Kessler 6 questionnaire for mental illness[19]. From these variables, we were able to  
18 code a partial list of comorbidities that Elixhauser and colleagues[20] suggest controlling for  
19 when using administrative medical data.

### 21 *Regression Analysis*

22 We used the two-stage model approach developed by Manning and Basu[12] to model discrete-  
23 continuous outcomes. The first regression in this method models whether or not an individual

1 had any medical expenditures in the given year. Then, the second model estimates the costs for  
2 individuals who the first model predicted had any costs. We used an ordinary least squares  
3 (OLS) logistic regression in the first step, followed by a generalized linear model with a  
4 generalized Gamma distribution in the second stage. We used the Stata twopm command  
5 developed by Belotti and colleagues to execute the two models[21]. The twopm command  
6 allowed us to use the survey weights provided by AHRQ. Data were collected and merged using  
7 SAS v9.4 analytical software [SAS Institute, Cary, NC]. Data management was performed in  
8 SAS and Stata IC v15 [Stata Corp, College Station, TX]. All data analysis was conducted using  
9 Stata.

11 Our main regression model (Model 1) included personal characteristics and current smoking  
12 status. We experimented with including body mass index in the model; however, the variable had  
13 near 50% missingness, so we excluded it from our final model. (Including it had negligible on  
14 estimated expenditures by smoking status.) We added the disease history to the two-stage model  
15 (Model 2). Finally, because COPD comorbidity was only available for the last three years of the  
16 study, we excluded COPD and re-ran the model on all five years of the study period. Because  
17 controlling for this co-morbidity did not noticeably affect the estimates by smoking status, we  
18 chose to report estimates based on 5 years of data, thus increasing our power to probe costs  
19 among subgroups. We replicated Model 2 to include data on years-since-quit for former  
20 smokers at 1-, 2-, and 5-year thresholds. Because prevalence of these risk factors changes over  
21 the life course, we also examined the marginal effects of smoking on medical expenditures by  
22 decade of adult life[21]. Non-overlapping confidence intervals indicated statistically significant  
23 differences.

1

2  
3  
4  
5  
6 **Results**

7 An average of 19.7 million adults self-identified as Current smokers in the US from 2011 to  
8 2015. The proportion of current smokers decreased over the study period, to approximately 17.5  
9 million adults in 2015. An average of 43.6 million adults in the U.S. were Ever smokers. The  
10 proportion of former smokers increased through decades of life, peaking over 22% for those  
11 older than 70-years-old. Tables 1a and 1b describe smoking status by study year and decade of  
12 life, respectively.

13  
14  
15  
16  
17  
18  
19  
20  
21  
22  
23

24 Table 2 displays the costs for American adults in 2011 – 2015 by smoking status. In Model 1,  
25 mean annual medical expenditures for US adults were \$4,830. Costs for adult Never smokers  
26 were below the national average (\$4,360). Former smokers had the highest annual medical  
27 expenses, \$5,590 (28% increase over never smokers). Although Current smokers had lower  
28 average costs than Former smokers at \$5,144 (18% increase over Never smokers), the 95%  
29 confidence intervals (CIs) overlap for Current and Former smokers. If we combine Current and  
30 Former smokers into Ever smokers and re-run Model 1, the average costs for someone who has  
31 ever smoked is \$5,400 (95% CI = 5142 – 5659).

32  
33  
34  
35  
36  
37  
38  
39  
40  
41  
42  
43

44 In Table 3, a sensitivity analysis for Model 2 that includes years-since-quitting for former  
45 smokers does not find a direct relationship between time since smoking cessation and medical  
46 expenditures. The mean expenditures by cessation period have small differences, and the 95%  
47 CIs greatly overlap. Table 4 identifies that the medical expenditures also are greater for Former  
48 smokers at each age decade, for ages 20 through 80. The 95% CIs for Never smokers in Table 4

49  
50  
51  
52  
53  
54  
55  
56  
57  
58  
59  
60

1 do not contain the estimate for Former smokers at each decade. The CIs for Former smokers do  
2 not contain the estimate for Never smokers at all decades except for age 20. The 95% CIs for  
3 Current smokers at each decade include both the Never and Former smoker estimates, and the  
4 CIs for Never and Former smokers include the estimate for Current smokers.

5  
6 Multiplying costs by average number of smokers for 2011 – 2015, current smokers incurred  
7 \$101.4 billion in average annual medical expenses, \$15 billion above the costs for a  
8 demographically comparable number of Never smokers. Former smokers incurred an average of  
9 \$133.6 billion in annual medical expenditures, a \$29 billion increase over comparable Never  
10 smokers. Average annual medical expenditures for Ever smokers are \$235.6 billion,  
11 approximately \$45 billion above the costs for a demographically comparable number of Never  
12 smokers.

## 13 14 **Discussion**

15 We updated the national estimates for smoking costs in American adults through 2015 using  
16 state-of-the-science economic modeling techniques. Our estimates for annual medical  
17 expenditures for all civilian non-institutionalized adults was \$4,830 for 2011 – 2015. This  
18 estimate for the study period was close to Mitchell and Machlin's[22] estimate of average total  
19 medical expenditures in 2015 using MEPS data (\$4,978). Our estimate for annual expenditures  
20 and marginal costs due to smoking are below similar estimates generated using the National  
21 Health Expenditure Assessment (NHEA) database[23, 24]. However, the NHEA is more  
22 comprehensive than the MEPS in capturing Medicaid costs covering institutionalized adults[24,  
23 25], so identifying lower estimate in MEPS is to be expected.

1

2  
3  
4  
5  
6  
7  
8  
9  
10  
11  
12  
13  
14  
15  
16  
17  
18  
19  
20  
21  
22  
23  
24  
25  
26  
27  
28  
29  
30  
31  
32  
33  
34  
35  
36  
37  
38  
39  
40  
41  
42  
43  
44  
45  
46  
47  
48  
49  
50  
51  
52  
53  
54  
55  
56  
57  
58  
59  
60

1  
2 We find that Former smokers have greater annual medical costs over Current and Never  
3 smokers; however, the 95% confident intervals overlap for Current and Former smokers in the  
4 main model. Surely, some smokers quit after diagnosis of costly health problems linked to  
5 smoking, but the cost differential narrows only slightly after controlling for major chronic  
6 conditions (many of which are linked to smoking). Especially at younger ages, quitting appears  
7 to be more likely to sort smokers by health consciousness and associated use of medical care.

8

9  
10  
11  
12  
13  
14  
15  
16  
17  
18  
19  
20  
21  
22  
23  
24  
25  
26  
27  
28  
29  
30  
31  
32  
33  
34  
35  
36  
37  
38  
39  
40  
41  
42  
43  
44  
45  
46  
47  
48  
49  
50  
51  
52  
53  
54  
55  
56  
57  
58  
59  
60

9  
10 Some older studies compared medical spending per capita among current, former, and never  
11 smokers. Using data from the 1987 National Medical Expenditure Survey (NMES), Miller and  
12 colleagues [1999] identified higher annual medical expenditures in former smokers over current  
13 smokers. Contrasting with the national studies, two studies using local claims data[26, 27] found  
14 that medial expenditures for current and former smokers were nearly identical, with a slight  
15 spike in costs for former smokers immediately following quitting.

15

16  
17  
18  
19  
20  
21  
22  
23  
24  
25  
26  
27  
28  
29  
30  
31  
32  
33  
34  
35  
36  
37  
38  
39  
40  
41  
42  
43  
44  
45  
46  
47  
48  
49  
50  
51  
52  
53  
54  
55  
56  
57  
58  
59  
60

16  
17 Some current smokers may experience very high cost medical expenditures over a short period  
18 before dying (and thus not incurring any further costs), while former smokers may continue to  
19 amass lower cost medical encounters. These former smokers would be gaining up to 10 years of  
20 survival and medical expenditures over current smokers[28]. Current smokers also may simply  
21 be doctor-phobic, anxious to avoid yet another lecture about their smoking. The persistence and  
22 perversity of our finding that higher medical expenditures in former smokers at all ages and  
23 regardless of time-since-quitting, suggests exploring the issue using qualitative methods.

23

1 We followed the methods of Xu and colleagues[5] and Max and colleagues[7-9] to identify  
2 current, former, and never smokers in NHIS/MEPS data. Those studies examined attributable  
3 fractions (AFs) for medical expenditures rather than costs to individuals. The two-part model  
4 developed by Manning and colleagues has become the gold-standard for estimating costs in a  
5 skewed sample, such as medical expenditures[12, 29]. It has been used to study the impact of  
6 smoking on healthcare costs across a wide variety of databases[6, 30, 31]. An analysis from  
7 An[6] using the two-stage model was performed on medical expenditures associated with  
8 smoking status (ever vs. never) and obesity ( $< 30$  BMI vs.  $30 \geq$  BMI) using MEPS data from  
9 1998 to 2011. In contrast to the present study, An's estimated expenditures did not control for  
10 quit status, marital status, family income, family size, or pregnancy. Our estimated cost  
11 differences between ever/never smokers and obese/non-obese individuals (data not shown) were  
12 lower than in the An study. We believe that the inclusion of quit status and additional personal  
13 characteristics in the two-stage models increases the precision of our estimate over this prior  
14 study.

### 16 *Limitations and Strengths*

17 Many of the prior studies assessing the impact of behavioral risk factors on medical expenditures  
18 employ the traditional attributable fraction approach, which constructs costs from selected acute  
19 and chronic conditions related to the individual risk factors of interest. This method is  
20 appropriate unless a study echoes our aim to examine the marginal effects of the risk behaviors  
21 on costs to individuals. Using the two-part model[12], our study provides a different assessment  
22 of medical expenditures than the attributable fraction method. Attributable fraction studies  
23 estimate the smoking-related medical costs incurred in treated diseases that resulted from

1 smoking. The two-stage modelling approach instead looks at the overall medical spending of the  
2 smoking cohort. It can be strongly influenced by a difference in care-seeking propensity.

3  
4 Our estimates for prevalence of smoking (9%) are lower than those found in other surveillance  
5 studies. The Behavioral Risk Factor Surveillance System (BRFSS) identified 15% of American  
6 adults as current smokers in 2015[32]. This discrepancy between BRFSS and NHIS data may be  
7 due to different modes of data collection. While BRFSS collects data through telephone surveys,  
8 NHIS collects data via within-household, in-person interviews. Unlike NHIS, BRFSS data  
9 collection is de-centralized as is the responsibility of each state health department.

10  
11 The goal of this study was to update medical expenditures for smoking to 2015. It was beyond  
12 the scope of the study to assess spending by type of medical service utilized. With sufficient  
13 budget, doing so might have allowed us to propose more hypotheses as to why certain risks had  
14 increased costs over others, as Sturm[33] did for obesity and problem drinking.

15  
16 In a period of low inflation, we chose to control for inflation in our multi-year analysis of  
17 expenditures by including dummy variables for MEPS year rather than using price adjusters that  
18 assume a fixed market basket of medical services. The dummy variables should account not only  
19 for year-to-year changes in costs, but for other endogenous temporal effects. Those effects  
20 include the many policy features of 2010's Affordable Care Act that went into effect from 2011  
21 to 2015[34].

22  
23 *Conclusion*

1 Our data fill a niche by updating medical expenditures nationwide across current smoking status.  
2 One clear application of our estimates is in computing the medical spending foregone because  
3 behavioral risk-takers have elevated risks of morbidity and mortality. Although tobacco cessation  
4 cause declines in chronic illness, early mortality, and associated costs, it appears they may not  
5 decrease annual medical expenditures per survivor. That finding suggests studies of return on  
6 investment in smoking cessation that use attributable-fraction-based costs may yield skewed  
7 results.

### 8 9 *Acknowledgement and Funding*

10 The research in this paper was conducted at the CFACT Data Center, and the support of AHRQ  
11 is acknowledged. The results and conclusions in this paper are those of the authors and do not  
12 indicate concurrence by AHRQ or the Department of Health and Human Services.

13 Funding for this project was provided by NHLBI grant AN: 3421751 (Implementation of HIT-  
14 Enhanced Tobacco Treatment for Hospitalized Smokers) and NCI grant R01CA201873  
15 (Optimizing Tobacco Dependence Treatment in the Emergency Department).

### 16 *Patient and Public Involvement- Cohort Description*

17 The data for this study were obtained from two datasets generated by the U.S. Department of  
18 Health and Human Services: the National Health Interview Survey (NHIS) and the Medical  
19 Expenditure Panel Survey (MEPS). Both surveys are samples of American adults that can be  
20 used to generate weighted estimates of medical care in the U.S. These pre-existing data were not  
21 identified to the researchers, so we could not contact them nor involve them in any aspect of the  
22 study design and analysis.

### 23 *Data Sharing-*



1  
2  
3 1 Data used in this study are held by AHRQ and U.S. DHHS and were used by agreement with the  
4  
5 2 researchers. Raw data used in this study cannot be shared.  
6

7  
8 3 *Author contributions*

9  
10 4 SLB, TRM, and DIS conceived of the study. DIS, GW, and TRM designed the analysis. DIS  
11  
12 5 conducted the analysis. DIS and BA wrote and edited drafts of the manuscript. All authors  
13  
14 6 provided input on the manuscript and approved of the final draft.  
15

16  
17 7 *Competing interests:*

18  
19 8 All authors state that they have no competing interests.  
20  
21  
22  
23  
24  
25  
26  
27  
28  
29  
30  
31  
32  
33  
34  
35  
36  
37  
38  
39  
40  
41  
42  
43  
44  
45  
46  
47  
48  
49  
50  
51  
52  
53  
54  
55  
56  
57  
58  
59  
60

## 1 **References**

- 2 1 U.S. Department of Health and Human Services. The Health Consequences of Smoking—50  
3 Years of Progress: A Report of the Surgeon General. Atlanta, GA: U.S. Department of  
4 Health and Human Services, Centers for Disease Control and Prevention, National Center  
5 for Chronic Disease Prevention and Health Promotion, Office on Smoking and Health,  
6 2014.
- 7 2 Warner KE. Cost effectiveness of smoking-cessation therapies. *Pharmacoecon*  
8 1997;11(6):538-49. doi: 10.2165/00019053-199711060-00003
- 9 3 LeBlanc ES, O'Connor E, Whitlock EP, et al. Effectiveness of primary care-relevant  
10 treatments for obesity in adults: A systematic evidence review for the U.S. Preventive  
11 Services Task Force. *Ann Intern Med* 2011;155(7):434-47. doi: 10.7326/0003-4819-155-  
12 7-201110040-00006
- 13 4 Fleming MF, Mundt MP, French MT, et al. Brief physician advice for problem drinkers: Long-  
14 term efficacy and benefit-cost analysis. *Alcohol Clin Exp Res* 2002;26(1):36-43.
- 15 5 Xu X, Bishop EE, Kennedy SM, et al. Annual healthcare spending attributable to cigarette  
16 smoking: an update. *Am J Prev Med* 2015;48(3):326-33. doi:  
17 10.1016/j.amepre.2014.10.012 [published Online First: 2014/12/17]
- 18 6 An R. Health care expenses in relation to obesity and smoking among U.S. adults by gender,  
19 race/ethnicity, and age group: 1998-2011. *Public Health* 2015;129(1):29-36. doi:  
20 10.1016/j.puhe.2014.11.003 [published Online First: 2014/12/30]
- 21 7 Max W, Sung HY, Shi Y, et al. The cost of smoking in California. *Nicotine Tob Res*  
22 2016;18(5):1222-9. doi: 10.1093/ntr/ntv123 [published Online First: 2015/07/15]

- 1  
2  
3 1 8 Max W, Rice D, Sung H, et al. The economic burden of smoking in California. *Tob Control*  
4  
5 2 2004;13(3):264-67.  
6  
7 3 9 Max W, Sung H-Y, Shi Y, et al. The Cost of Smoking in California, 2009. San Francisco, CA:  
8  
9 Institute for Health & Aging, University of California, San Francisco, 2014.  
10  
11 4  
12 5 10 Rockhill B, Newman B, Weinberg C. Use and misuse of population attributable fractions. *Am*  
13  
14 6 *J Public Health* 1998;88(1):15-19.  
15  
16 7 11 Lavelle TA, Kent DM, Lundquist CM, et al. Patient variability seldom assessed in cost-  
17  
18 8 effectiveness studies. *Med Decis Making* 2018;38(4):487-94.  
19  
20 9 12 Manning WG, Basu A, Mullahy J. Generalized modeling approaches to risk adjustment of  
21  
22 10 skewed outcomes data. *J Health Econ* 2005;24(3):465-88. doi:  
23  
24 11 10.1016/j.jhealeco.2004.09.011 [published Online First: 2005/04/07]  
25  
26 12 13 Jackson CA, Manning WG, Jr., Wells KB. Impact of prior and current alcohol use on use of  
27  
28 13 services by patients with depression and chronic medical illnesses. *Health Serv Res*  
29  
30 14 1995;30(5):687-705. [published Online First: 1995/12/01]  
31  
32 15 14 Butler CC, Pill R, Stott NCH. Qualitative study of patients' perceptions of doctors' advice to  
33  
34 16 quit smoking: implications for opportunistic health promotion. *BMJ*  
35  
36 17 1998;316(7148):1878-81. doi: 10.1136/bmj.316.7148.1878  
37  
38 18 15 National Center for Health Statistics. National Health Interview Survey 2018 [Available  
39  
40 19 from: <https://www.cdc.gov/nchs/nhis/index.htm>.  
41  
42 20 16 Agency for Healthcare Research and Quality. Medical Expenditure Panel Survey 2018  
43  
44 21 [Available from: <https://meps.ahrq.gov/mepsweb/>.  
45  
46  
47  
48  
49  
50  
51  
52  
53  
54  
55  
56  
57  
58  
59  
60

- 1  
2  
3 1 17 Sengupta N, Nichol MB, Wu J, et al. Mapping the SF-12 to the HUI3 and VAS in a Managed  
4  
5 2 Care Population. *Med Care* 2004;42(9):927-37. doi:  
6  
7 3 10.1097/01.mlr.0000135812.52570.42  
8  
9  
10 4 18 Arroll B, Goodyear-Smith F, Crengle S, et al. Validation of PHQ-2 and PHQ-9 to screen for  
11  
12 5 major depression in the primary care population. *Ann Fam Med* 2010;8(4):348-53. doi:  
13  
14 6 10.1370/afm.1139 [published Online First: 2010/07/21]  
15  
16  
17 7 19 Kessler RC, Barker PR, Colpe LJ, et al. Screening for serious mental illness in the general  
18  
19 8 population. *Arch Gen Psychiatry* 2003;60(2):184-89. doi: 10.1001/archpsyc.60.2.184  
20  
21  
22 9 20 Elixhauser A, Steiner C, Harris D, et al. Comorbidity measures for use with administrative  
23  
24 10 data. *Med Care* 1998;36(1):8-27.  
25  
26  
27 11 21 Belotti F, Deb P, Manning WG, et al. twopm: Two-part models. *Stata J* 2015;15(1):3-20.  
28  
29 12 22 Mitchell E, Machlin S. Concentration of health expenditures and selected characteristics of  
30  
31 13 high spenders, U.S. civilian noninstitutionalized population, 2015. Statistical Brief #506.  
32  
33 14 Rockville, MD: Agency for Healthcare Research and Quality, 2017.  
34  
35  
36 15 23 Lassman D, Hartman M, Washington B, et al. US health spending trends by age and gender:  
37  
38 16 Selected years 2002–10. *Health Aff* 2014;33(5):815-22.  
39  
40  
41 17 24 Finkelstein EA, Trogdon JG, Cohen JW, et al. Annual medical spending attributable to  
42  
43 18 obesity: Payer-and service-specific estimates. *Health Aff* 2009;28(5):w822-w31. doi:  
44  
45 19 10.1377/hlthaff.28.5.w822 [published Online First: 2009/07/29]  
46  
47  
48 20 25 Sing M, Banthin JS, Selden TM, et al. Reconciling medical expenditure estimates from the  
49  
50 21 MEPS and NHEA, 2002. *Health Care Financ Rev* 2006;28(1):25-40.  
51  
52  
53  
54  
55  
56  
57  
58  
59  
60

- 1  
2  
3 1 26 Fishman PA, Khan ZM, Thompson EE, et al. Health care costs among smokers, former  
4  
5 2 smokers, and never smokers in an HMO. *Health Serv Res* 2003;38(2):733-49. doi:  
6  
7 3 10.1111/1475-6773.00142  
8  
9  
10 4 27 Hockenberry JM, Curry SJ, Fishman PA, et al. Healthcare costs around the time of smoking  
11  
12 5 cessation. *Am J Prev Med* 2012;42(6):596-601. doi: 10.1016/j.amepre.2012.02.019  
13  
14 6 28 Jha P, Ramasundarahettige C, Landsman V, et al. 21st-century hazards of smoking and  
15  
16 7 benefits of cessation in the United States. *N Engl J Med* 2013;368(4):341-50. doi:  
17  
18 8 10.1056/NEJMsa1211128 [published Online First: 2013/01/25]  
19  
20  
21 9 29 Buntin MB, Zaslavsky AM. Too much ado about two-part models and transformation?  
22  
23 10 Comparing methods of modeling Medicare expenditures. *J Health Econ* 2004;23(3):525-  
24  
25 11 42.  
26  
27  
28 12 30 Coughlan D, Yeh ST, O'Neill C, et al. Evaluating direct medical expenditures estimation  
29  
30 13 methods of adults using the medical expenditure panel survey: An example focusing on  
31  
32 14 head and neck cancer. *Value Health* 2014;17(1):90-7. doi: 10.1016/j.jval.2013.10.004  
33  
34 15 [published Online First: 2014/01/21]  
35  
36  
37 16 31 Baumeister SE, Böger CA, Krämer BK, et al. Effect of chronic kidney disease and comorbid  
38  
39 17 conditions on health care costs: A 10-year observational study in a general population.  
40  
41 18 *Am J Nephrol* 2010;31(3):222-29.  
42  
43  
44 19 32 Jamal A, King B, Neff L, et al. Current cigarette smoking among adults—United States,  
45  
46 20 2005–2015. *MMWR Morb Mortal Wkly Rep* 2016;65:1205–11. doi:  
47  
48 21 <http://dx.doi.org/10.15585/mmwr.mm6544a2>  
49  
50  
51 22 33 Sturm R. The effects of obesity, smoking, and drinking on medical problems and costs.  
52  
53 23 *Health Aff* 2002;21(2):245-53.  
54  
55  
56  
57  
58  
59  
60

1  
2  
3 1 34 French MT, Homer J, Gumus G, et al. Key provisions of the patient protection and Affordable  
4  
5 2 Care Act (ACA): A systematic review and presentation of early research findings. *Health*  
6  
7 3 *Serv Res* 2016;51(5):1735-71. doi: 10.1111/1475-6773.12511  
8  
9  
10 4  
11  
12 5  
13  
14  
15  
16  
17  
18  
19  
20  
21  
22  
23  
24  
25  
26  
27  
28  
29  
30  
31  
32  
33  
34  
35  
36  
37  
38  
39  
40  
41  
42  
43  
44  
45  
46  
47  
48  
49  
50  
51  
52  
53  
54  
55  
56  
57  
58  
59  
60

For peer review only

- 1 **Table 1.** Prevalence of smoking by year of MEPS data collection (a) and decade of age (b).  
 2 Average participants in each category were developed using survey weights.

| Table 1a | Smoking status by year of medical expenditure |       |       |       |       |             |
|----------|-----------------------------------------------|-------|-------|-------|-------|-------------|
|          | 2011                                          | 2012  | 2013  | 2014  | 2015  | n           |
| Current  | 7.7%                                          | 8.7%  | 8.4%  | 7.9%  | 7.3%  | 19,716,719  |
| Never    | 83.7%                                         | 81.6% | 81.6% | 81.6% | 82.4% | 206,862,703 |
| Former   | 8.6%                                          | 9.7%  | 10.0% | 10.5% | 10.3% | 23,900,571  |
| Table 1b | Smoking status by decade of life              |       |       |       |       |             |
|          | 18-30                                         | 31-40 | 41-50 | 51-60 | 61-70 | 70+         |
| Current  | 6.8%                                          | 9.8%  | 9.2%  | 9.6%  | 7.4%  | 4.4%        |
| Never    | 90.5%                                         | 83.2% | 83.8% | 79.8% | 76.8% | 73.3%       |
| Former   | 2.7%                                          | 7.0%  | 7.1%  | 10.6% | 15.7% | 22.3%       |

- 3  
4  
5

**Table 2.** Results of the two-part model for smoking status on mean medical expenditures per year, 2011 – 2015. Model 1 included smoking and personal characteristics only <sup>a</sup>. Model 2 included personal characteristics, smoking, and comorbidities <sup>b</sup>. (CI = Confidence interval)

|                | Model 1   |                 | Model 2   |                 |
|----------------|-----------|-----------------|-----------|-----------------|
|                | Mean cost | 95% CI          | Mean cost | 95% CI          |
| Never Smoker   | \$4,360   | 4154.3 - 4566.3 | \$4,499   | 4219.6 - 4778.9 |
| Current Smoker | \$5,144   | 4707.9 - 5580.3 | \$4,647   | 4186.9 - 5107.0 |
| Former Smoker  | \$5,590   | 5267.4 - 5913.5 | \$5,012   | 4618.4 - 5406.4 |

<sup>a</sup> Covariates included in Model 1 were age (continuous), gender, race/ethnicity (White, African American, Asian, Hispanic origin, Other), education (No high school degree, High school or some college, At least college graduate), marital status (Single/Never married, Current married, Widowed/Divorced/Separated), Pregnancy in the prior year, employment status (Unemployed, Employed, Full-time student, Never worked, Retired), logged-total family income, insurance status (Private, Any public insurance (under age 65), Medicare/Medicaid+, Uninsured), family size, year dummy variables, any binge drinking in the prior year, and BMI (Normal weight or Underweight, Overweight or Obese).

<sup>b</sup> In addition to the variables in Model 1, a history of the following conditions were added to Model 2: any cancer, diabetes, asthma, arthritis, cardiovascular disease (angina, coronary heart disease, myocardial infarction, or stroke), emphysema, quality of life calculated from Short Form 12, depression calculated from the Personal Health Questionnaire, and mental illness from the Kessler 6 questionnaire.



1 **Table 3.** Results of separate runs of the two-part model of mean medical expenditures for  
2 Former smokers using 1-, 2-, and 5-year thresholds for years-since-quitting smoking. (CI =  
3 Confidence interval)

| Years since quitting | Mean    | 95% CI          |
|----------------------|---------|-----------------|
| 1 or fewer years     | \$5,036 | 3604.4 - 6646.6 |
| More than 1 year     | \$5,006 | 4588.8 - 5422.3 |
| 2 or fewer years     | \$5,132 | 4035.0 - 6229.6 |
| More than 2 years    | \$4,986 | 4543.6 - 5429.1 |
| 5 or fewer years     | \$4,957 | 4182.8 - 5730.7 |
| More than 5 years    | \$5,028 | 4551.1 - 5505.2 |

4  
5  
6  
7  
8  
9  
10  
11  
12  
13  
14  
15  
16  
17  
18  
19  
20  
21  
22  
23  
24  
25  
26  
27  
28  
29  
30  
31  
32  
33  
34  
35  
36  
37  
38  
39  
40  
41  
42  
43  
44  
45  
46  
47  
48  
49  
50  
51  
52  
53  
54  
55  
56  
57  
58  
59  
60

For peer review only

**Table 4.** Average annual medical expenditures in American adults for 2011 – 2015 by age for smoking status from a two-part model including personal characteristics and disease history at each decade, age 20 – 80.

| Smoking status | Age      |              |          |              |          |              |          |              |
|----------------|----------|--------------|----------|--------------|----------|--------------|----------|--------------|
|                | 20       |              | 30       |              | 40       |              | 50       |              |
|                | Estimate | 95% CI       |
| Never          | \$2,743  | (2366, 3151) | \$3,214  | (2857, 3571) | \$3,763  | (3472, 4054) | \$4,401  | (4160, 4642) |
| Current        | \$2,909  | (2390, 3428) | \$3,413  | (2928, 3897) | \$4,000  | (3561, 4438) | \$4,683  | (4284, 5081) |
| Former         | \$3,208  | (2704, 3711) | \$3,754  | (3301, 4208) | \$4,390  | (3947, 4783) | \$5,130  | (4776, 5483) |
| Smoking status | Age      |              |          |              |          |              |          |              |
|                | 60       |              | 70       |              | 80       |              |          |              |
|                | Estimate | 95% CI       | Estimate | 95% CI       | Estimate | 95% CI       |          |              |
| Never          | \$5,143  | (4846, 5440) | \$6,007  | (5505, 6508) | \$7,010  | (6184, 7836) |          |              |
| Current        | \$5,478  | (5059, 5897) | \$6,403  | (5839, 6968) | \$7,479  | (6627, 8331) |          |              |
| Former         | \$5,990  | (5574, 6407) | \$6,990  | (6357, 7623) | \$8,153  | (7160, 9145) |          |              |

**CHEERS Checklist****Items to include when reporting economic evaluations of health interventions**

The ISPOR CHEERS Task Force Report, *Consolidated Health Economic Evaluation Reporting Standards (CHEERS)—Explanation and Elaboration: A Report of the ISPOR Health Economic Evaluations Publication Guidelines Good Reporting Practices Task Force*, provides examples and further discussion of the 24-item CHEERS Checklist and the CHEERS Statement. It may be accessed via the *Value in Health* or via the ISPOR Health Economic Evaluation Publication Guidelines – CHEERS: Good Reporting Practices webpage: <http://www.ispor.org/TaskForces/EconomicPubGuidelines.asp>

| Section/item                    | Item No | Recommendation                                                                                                                                                                             | Reported on page No/line No |
|---------------------------------|---------|--------------------------------------------------------------------------------------------------------------------------------------------------------------------------------------------|-----------------------------|
| <b>Title and abstract</b>       |         |                                                                                                                                                                                            |                             |
| Title                           | 1       | Identify the study as an economic evaluation or use more specific terms such as “cost-effectiveness analysis”, and describe the interventions compared.                                    | <u>Title Page</u>           |
| Abstract                        | 2       | Provide a structured summary of objectives, perspective, setting, methods (including study design and inputs), results (including base case and uncertainty analyses), and conclusions.    | <u>P1 Line 2-19</u>         |
| <b>Introduction</b>             |         |                                                                                                                                                                                            |                             |
| Background and objectives       | 3       | Provide an explicit statement of the broader context for the study.<br>Present the study question and its relevance for health policy or practice decisions.                               | <u>P1-2</u>                 |
| <b>Methods</b>                  |         |                                                                                                                                                                                            |                             |
| Target population and subgroups | 4       | Describe characteristics of the base case population and subgroups analysed, including why they were chosen.                                                                               | <u>P4 LG-16</u>             |
| Setting and location            | 5       | State relevant aspects of the system(s) in which the decision(s) need(s) to be made.                                                                                                       | <u>N/A</u>                  |
| Study perspective               | 6       | Describe the perspective of the study and relate this to the costs being evaluated.                                                                                                        | <u>P4 L7</u>                |
| Comparators                     | 7       | Describe the interventions or strategies being compared and state why they were chosen.                                                                                                    | <u>P4 11-16</u>             |
| Time horizon                    | 8       | State the time horizon(s) over which costs and consequences are being evaluated and say why appropriate.                                                                                   | <u>B-P4</u>                 |
| Discount rate                   | 9       | Report the choice of discount rate(s) used for costs and outcomes and say why appropriate.                                                                                                 | <u>P11 L16-21</u>           |
| Choice of health outcomes       | 10      | Describe what outcomes were used as the measure(s) of benefit in the evaluation and their relevance for the type of analysis performed.                                                    | <u>N/A</u>                  |
| Measurement of effectiveness    | 11a     | <i>Single study-based estimates:</i> Describe fully the design features of the single effectiveness study and why the single study was a sufficient source of clinical effectiveness data. | <u>N/A</u>                  |

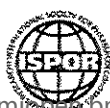

1  
2  
3  
4  
5  
6  
7  
8  
9  
10  
11  
12  
13  
14  
15  
16  
17  
18  
19  
20  
21  
22  
23  
24  
25  
26  
27  
28  
29  
30  
31  
32  
33  
34  
35  
36  
37  
38  
39  
40  
41  
42  
43  
44  
45  
46  
47  
48  
49  
50  
51  
52  
53  
54  
55  
56  
57  
58  
59  
60

|                                                        |     |                                                                                                                                                                                                                                                                                                                                                       |                   |
|--------------------------------------------------------|-----|-------------------------------------------------------------------------------------------------------------------------------------------------------------------------------------------------------------------------------------------------------------------------------------------------------------------------------------------------------|-------------------|
|                                                        | 11b | <i>Synthesis-based estimates:</i> Describe fully the methods used for identification of included studies and synthesis of clinical effectiveness data.                                                                                                                                                                                                | <u>N/A</u>        |
| Measurement and valuation of preference based outcomes | 12  | If applicable, describe the population and methods used to elicit preferences for outcomes.                                                                                                                                                                                                                                                           | <u>N/A</u>        |
| Estimating resources and costs                         | 13a | <i>Single study-based economic evaluation:</i> Describe approaches used to estimate resource use associated with the alternative interventions. Describe primary or secondary research methods for valuing each resource item in terms of its unit cost. Describe any adjustments made to approximate to opportunity costs.                           | <u>—</u>          |
|                                                        | 13b | <i>Model-based economic evaluation:</i> Describe approaches and data sources used to estimate resource use associated with model health states. Describe primary or secondary research methods for valuing each resource item in terms of its unit cost. Describe any adjustments made to approximate to opportunity costs.                           | <u>P4-6</u>       |
| Currency, price date, and conversion                   | 14  | Report the dates of the estimated resource quantities and unit costs. Describe methods for adjusting estimated unit costs to the year of reported costs if necessary. Describe methods for converting costs into a common currency base and the exchange rate.                                                                                        | <u>P11</u>        |
| Choice of model                                        | 15  | Describe and give reasons for the specific type of decision-analytical model used. Providing a figure to show model structure is strongly recommended.                                                                                                                                                                                                | <u>P2-3</u>       |
| Assumptions                                            | 16  | Describe all structural or other assumptions underpinning the decision-analytical model.                                                                                                                                                                                                                                                              | <u>P2,3,6</u>     |
| Analytical methods                                     | 17  | Describe all analytical methods supporting the evaluation. This could include methods for dealing with skewed, missing, or censored data; extrapolation methods; methods for pooling data; approaches to validate or make adjustments (such as half cycle corrections) to a model; and methods for handling population heterogeneity and uncertainty. | <u>P2-6,10,11</u> |
| <b>Results</b>                                         |     |                                                                                                                                                                                                                                                                                                                                                       |                   |
| Study parameters                                       | 18  | Report the values, ranges, references, and, if used, probability distributions for all parameters. Report reasons or sources for distributions used to represent uncertainty where appropriate. Providing a table to show the input values is strongly recommended.                                                                                   | <u>P7, T1</u>     |
| Incremental costs and outcomes                         | 19  | For each intervention, report mean values for the main categories of estimated costs and outcomes of interest, as well as mean differences between the comparator groups. If applicable, report incremental cost-effectiveness ratios.                                                                                                                | <u>T1</u>         |
| Characterising uncertainty                             | 20a | <i>Single study-based economic evaluation:</i> Describe the effects of sampling uncertainty for the estimated incremental cost and incremental effectiveness parameters, together with the impact                                                                                                                                                     | <u>T2-4</u>       |

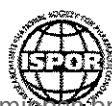

|                                                                      |     |                                                                                                                                                                                                                                                                            |        |
|----------------------------------------------------------------------|-----|----------------------------------------------------------------------------------------------------------------------------------------------------------------------------------------------------------------------------------------------------------------------------|--------|
|                                                                      |     | of methodological assumptions (such as discount rate, study perspective).                                                                                                                                                                                                  |        |
|                                                                      | 20b | <i>Model-based economic evaluation</i> : Describe the effects on the results of uncertainty for all input parameters, and uncertainty related to the structure of the model and assumptions.                                                                               |        |
| Characterising heterogeneity                                         | 21  | If applicable, report differences in costs, outcomes, or cost-effectiveness that can be explained by variations between subgroups of patients with different baseline characteristics or other observed variability in effects that are not reducible by more information. | N/A    |
| <b>Discussion</b>                                                    |     |                                                                                                                                                                                                                                                                            |        |
| Study findings, limitations, generalisability, and current knowledge | 22  | Summarise key study findings and describe how they support the conclusions reached. Discuss limitations and the generalisability of the findings and how the findings fit with current knowledge.                                                                          | P45-11 |
| <b>Other</b>                                                         |     |                                                                                                                                                                                                                                                                            |        |
| Source of funding                                                    | 23  | Describe how the study was funded and the role of the funder in the identification, design, conduct, and reporting of the analysis. Describe other non-monetary sources of support.                                                                                        | P12    |
| Conflicts of interest                                                | 24  | Describe any potential for conflict of interest of study contributors in accordance with journal policy. In the absence of a journal policy, we recommend authors comply with International Committee of Medical Journal Editors recommendations.                          |        |

For consistency, the CHEERS Statement checklist format is based on the format of the CONSORT statement checklist

The **ISPOR CHEERS Task Force Report** provides examples and further discussion of the 24-item CHEERS Checklist and the CHEERS Statement. It may be accessed via the *Value in Health* link or via the ISPOR Health Economic Evaluation Publication Guidelines – CHEERS: Good Reporting Practices webpage: <http://www.ispor.org/TaskForces/EconomicPubGuidelines.asp>

The citation for the CHEERS Task Force Report is:

Husereau D, Drummond M, Petrou S, et al. Consolidated health economic evaluation reporting standards (CHEERS)—Explanation and elaboration: A report of the ISPOR health economic evaluations publication guidelines good reporting practices task force. *Value Health* 2013;16:231-50.

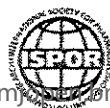

# BMJ Open

## National medical expenditures by smoking status in American adults: an application of Manning's two-stage model to nationally-representative data

|                                 |                                                                                                                                                                                                                                                                                                                                                                    |
|---------------------------------|--------------------------------------------------------------------------------------------------------------------------------------------------------------------------------------------------------------------------------------------------------------------------------------------------------------------------------------------------------------------|
| Journal:                        | <i>BMJ Open</i>                                                                                                                                                                                                                                                                                                                                                    |
| Manuscript ID                   | bmjopen-2018-026592.R1                                                                                                                                                                                                                                                                                                                                             |
| Article Type:                   | Research                                                                                                                                                                                                                                                                                                                                                           |
| Date Submitted by the Author:   | 28-Mar-2019                                                                                                                                                                                                                                                                                                                                                        |
| Complete List of Authors:       | Swedler, David; Pacific Institute for Research and Evaluation, Miller, Ted; Pacific Institute for Research and Evaluation; Curtin University - Perth City Campus<br>Ali, Bina; Pacific Institute for Research and Evaluation<br>Waeher, Geetha; Pacific Institute for Research and Evaluation<br>Bernstein, Steven L.; Yale School of Medicine, Emergency Medicine |
| <b>Primary Subject Heading</b>: | Smoking and tobacco                                                                                                                                                                                                                                                                                                                                                |
| Secondary Subject Heading:      | Health economics, Health services research                                                                                                                                                                                                                                                                                                                         |
| Keywords:                       | HEALTH ECONOMICS, PUBLIC HEALTH, STATISTICS & RESEARCH METHODS                                                                                                                                                                                                                                                                                                     |
|                                 |                                                                                                                                                                                                                                                                                                                                                                    |

SCHOLARONE™  
Manuscripts

1  
2  
3 **1 National medical expenditures by smoking status in American adults: an application of**  
4 **2 Manning's two-stage model to nationally-representative data**  
5  
6 **3**

7 **4 David I. Swedler, PhD<sup>1</sup>**

8 **5 Ted R. Miller, PhD<sup>1,2</sup>**

9 **6 Bina Ali, PhD<sup>1</sup>**

10 **7 Geetha Waecher, PhD<sup>1</sup>**

11 **8 Steven L. Bernstein, MD<sup>3</sup>**

12 **9**  
13 **10**  
14 **11**  
15 **12**  
16 **13**  
17 **14**  
18 **15**  
19 **16**  
20 **17**  
21 **18**  
22 **19**  
23 **20**  
24 **21**  
25 **22**  
26 **23**  
27 **24**  
28 **25**  
29 **26**  
30 **27**  
31 **28**  
32 **29**  
33 **30**  
34 **31**  
35 **32**  
36 **33**  
37 **34**  
38 **35**  
39 **36**  
40 **37**  
41 **38**  
42 **39**  
43 **40**  
44 **41**  
45 **42**  
46 **43**  
47 **44**  
48 **45**  
49 **46**  
50 **47**  
51 **48**  
52 **49**  
53 **50**  
54 **51**  
55 **52**  
56 **53**  
57 **54**  
58 **55**  
59 **56**  
60 **57**

<sup>1</sup> Pacific Institute for Research and Evaluation, Calverton, MD, USA

<sup>2</sup> Curtin University School of Public Health, Perth, Australia

<sup>3</sup> Department of Emergency Medicine, Yale School of Medicine; Department of Health Policy,  
Yale School of Public Health, New Haven, CT, USA

Corresponding Author: David Swedler  
Pacific Institute for Research and Evaluation  
11720 Beltsville Dr., Ste. 900  
Calverton, MD 20705, United States of America  
phone: 1-301-755-2446  
fax: 1-301-755-2799  
[dswedler@pire.org](mailto:dswedler@pire.org)

**Word Count: 2693**

**Reference Count: 34**

**Keywords: economics; quit status; age effects; MEPS**

## 1 **Abstract**

2 **Objectives:** To assess the medical expenditures of American adults by their smoking status-  
3 Current, Former, or Never smokers. We update these expenditures controlling for personal  
4 characteristics and medical history and also assess the impact of years-since-quit and decade  
5 of life. **Setting and participants:** Weighted sample of American adults, 2011 – 2015. The linked  
6 National Health Interview Survey (NHIS) and Medical Expenditure Panel Survey (MEPS) are  
7 annual weighted representations of approximately 250 million adults. Sampling of NHIS is  
8 multistage with data collected throughout the year. **Primary outcome measures:** Using data  
9 from NHIS and MEPS, we collected demographic data, self-reported medical history, and  
10 current smoking status. Smoking status was designated as Never, Current, and Former, along  
11 with years-since-quit. Total medical expenditures were collected from MEPS for 2011 –  
12 2015. We used Manning’s two-part model to estimate average expenditures per individual and  
13 marginal costs for individuals at all levels of smoking status. **Results:** American adults averaged  
14 \$4,830 in average medical expenditures. Never smokers (\$4,360, 95% CI = 4154.3 – 4566.3),  
15 had lower expenditures than Current (\$5,244, 95% CI = 4707.9 – 5580.3) and Former (\$5,590,  
16 95% CI = 5267.4 – 5913.5) smokers. Confidence intervals for Current and Former smokers  
17 overlapped. Results were similarly significant when controlling for disease history. Years-since-  
18 quitting did not affect expenditures. In each decade of adult life, Former smokers had the highest  
19 annual medical expenditures, followed by Current and then Never smokers. **Conclusions:** We  
20 updated annual medical expenditures during the Affordable Care Act-era by smoking status  
21 using the current best practice model. While we identify Former smokers as having higher  
22 medical expenditures than Current smokers, we do not examine how care-seeking behavior  
23 varies between levels of each risk factor.



## 1 **Article Summary**

### 2 *Strengths and Limitations*

- 3 • This is the first study to report medical expenditure by smoking status while major  
4 provisions of the Affordable Care Act took effect.
- 5 • We use the gold standard two-part model developed by Manning to estimate medical  
6 expenditures from the MEPS and NHIS surveys.
- 7 • We analyzed medical expenditures for Current smokers and Former smokers- both  
8 separately and combined- across decades of life.
- 9 • Although we controlled for history of comorbidities, the data do not contain any  
10 information on reason-for-quitting among former smokers.
- 11 • The cost differences observed incorporate any differences between the groups in care-  
12 seeking for conditions unrelated to smoking.

## 1 Introduction

2 It is well-established that smoking can lead to medical conditions requiring acute and chronic  
3 treatment<sup>1</sup>. Accurate marginal costs for medical risk factors are important when conducting  
4 benefit-cost analyses for health risk behavior interventions<sup>2-4</sup>. The most recent national estimates  
5 of medical expenditures by smoking status have only considered a binary smoking variable:  
6 current smokers versus current non-smokers<sup>5 6</sup>. Further, none of these national studies have  
7 analyzed medical expenditure data more recently than 2011. A series of state-level analyses by  
8 Max and colleagues<sup>7-9</sup> described medical costs in California by current, former, and never  
9 smokers.

11 The California studies used the attributable fraction (AF) method to allocate medical  
12 expenditures. In their review of the AF method, Rockhill and colleagues define attributable  
13 fraction and similarly-phrased terms to be “the proportion of disease risk in a population that can  
14 be attributed to the causal effects of a risk factor or set of factors,” (p. 15)<sup>10</sup>. Rockhill *et al* find  
15 that the AF method has limitations, including that it is constrained by how accurately costs are  
16 allocated among diagnoses and by the availability of accurate AFs that are not confounded by  
17 co-occurring risk factors<sup>10</sup>. The negative outcomes that smokers experience vary widely in nature  
18 and timing. Importantly, the method does not measure the standard error for the mean estimated  
19 cost per risk-taker<sup>11</sup>.

21 In analyzing the costs of medical conditions, health economics literature has largely shifted from  
22 this AF method to analyses of annual per capita medical spending of people with the condition  
23 relative to a comparison group<sup>12-15</sup>. This approach, pioneered by Willard Manning<sup>16</sup> captures

1 both mean and standard error and it accounts for complications that may not be coded to the  
2 underlying condition. That is, these equations take a more holistic view of medical care and  
3 expenditures associated with risk factors' coefficients than would a process seeking to attribute  
4 specified treatment costs to specified factors. It allows that medical visits for conditions related  
5 to the behavioral risk factors may displace other medical care that might be sought if an  
6 individual did not have a given risk factor. For example, a doctor who is scheduling quarterly  
7 visits to manage diabetes is unlikely to separately schedule the annual well-care visit  
8 recommended for a healthier patient. That well-care visit gets coded as a chronic care visit even  
9 though it may not raise annual medical spending<sup>17</sup>.

11 While the Manning model is now the gold standard for working with skewed outcomes like  
12 medical spending, it is an imperfect tool. Although it statistically assigns costs to given risk  
13 factors or medical conditions, it does not tell us the "why" behind each individual medical  
14 encounter or expense. Medical spending is influenced by care-seeking behavior. Smokers may  
15 avoid visiting the doctor because it is uncomfortable to report their continued smoking behavior  
16 or tedious to hear the doctor urge them to change<sup>18</sup>. Health consciousness and associated use of  
17 preventive care may be below-average for people who engage in risky behavior. Furthermore,  
18 drinking heavily may be a symptom of life management issues that reduce care-seeking. Those  
19 differences in health management may mask the impacts of risk behavior on medical spending.

### 21 *Purpose*

22 This study updates the national estimates for annual medical expenditures of adult Americans by  
23 their current smoking status. We examine medical expenditure data for 2011 – 2015 and apply

1 the cutting-edge two-stage Manning model to more accurately assess error around mean  
2 expenditures.

## 3 4 **Methods**

### 5 *Data Collection*

6 We analyzed data on smoking status from the National Health Interview Survey (NHIS)<sup>19</sup>. The  
7 NHIS is an annual, cross-sectional survey designed to monitor health and behaviors of civilian,  
8 non-institutionalized Americans through a nationally-representative sample. The Medical  
9 Expenditure Panel Survey (MEPS) tracks a nationally representative subsample of NHIS  
10 participants for 24 months starting in the year after their NHIS interview. MEPS collects five  
11 rounds of data per respondent on healthcare visits and expenditures<sup>20</sup>. It captures all payments  
12 for care, regardless of source, and models costs for visits without payment data including charity  
13 care and visits bundled into capitated care. We used 2011-2015 MEPS data on total medical  
14 expenditures from the individual perspective for adults 18-years and older and the corresponding  
15 NHIS 2009 – 2014 data. Annual medical expenditures were inflated to 2015 US dollars (USD)  
16 using the Personal Consumption Expenditures- Medical Care. We linked data from MEPS and  
17 NHIS via the Agency for Health Care Quality Data Center, as Xu *et al*<sup>5</sup> did in their analyses of  
18 smoking costs<sup>6</sup>. Because our use of the publicly-available data adhered to the government's  
19 privacy restrictions, the project was given an Exemption by the Institutional Review Board of the  
20 Pacific Institute for Research and Evaluation prior to data analysis.

21  
22 Smoking status was identified through the NHIS Supplemental Adult Questionnaire (SAQ). Like  
23 earlier studies, we identified Ever smokers as participants who smoked at least 100 cigarettes in

1 their lifetimes. We defined all others as Never smokers<sup>6</sup>. Ever smokers were further subdivided  
2 into those who reported quitting smoking, Former smokers, versus those who did not report  
3 quitting, Current smokers<sup>7-9</sup>. For Former smokers, we also identified years-since-quitting.

4  
5 To conduct regressions, we included the following demographic and behavioral characteristics:  
6 age, sex, race/ethnicity, marital status, total family income, family size, employment status,  
7 marital status, self-reported binge drinking status, body mass index (BMI), recent pregnancy,  
8 education level, employment, and insurance data from MEPS. Age was employed as a  
9 continuous variable in the main analyses and divided into ten-year blocks in the age-specific  
10 sensitivity analysis. Binge drinking data were also obtained from the SAQ, which used the  
11 accepted binge drinking definition of men having 5 or more drinks and women having 4 or more  
12 drinks. Those participants who indicated that they had 12 or more instances of binge drinking in  
13 the past year were categorized as frequent binge drinkers, and those who had 1-11 instances were  
14 categorized as infrequent binge drinkers. BMI data were calculated from self-reported weight  
15 and height in the NHIS. We dichotomized BMI into obese for those with a BMI of 30 kg/m<sup>2</sup> or  
16 greater, and not obese for those with lower BMI. We refer to these variables collectively as  
17 personal characteristics.

18  
19 NHIS and MEPS had data on self-reported diagnosis history for various diseases. Using data  
20 from both databases, we generated dichotomous variables for whether a participant had ever  
21 been diagnosed with the following diseases: asthma, arthritis, any cancer, cardiovascular diseases  
22 (including angina, coronary heart disease, myocardial infarction, or stroke), diabetes, and  
23 emphysema. NHIS had data on chronic obstructive pulmonary disease (COPD) available for

1 2013 through 2015 MEPS panels. From MEPS, we obtained scores for the Short Form 12 to  
2  
3 measure quality of life<sup>21</sup>, the Personal Health Questionnaire (PHQ) metric for depression<sup>22</sup>, and  
4  
5 the Kessler 6 questionnaire for mental illness<sup>23</sup>. From these variables, we were able to code a  
6  
7 partial list of comorbidities that Elixhauser and colleagues<sup>24</sup> suggest controlling for when using  
8  
9 administrative medical data.  
10  
11  
12  
13  
14  
15  
16

### 17 *Regression Analysis*

18  
19 We used the two-stage model approach developed by Manning and Basu<sup>16</sup> to model discrete-  
20  
21 continuous outcomes. The first regression in this method models whether or not an individual  
22  
23 had any medical expenditures in the given year. Then, the second model estimates the costs for  
24  
25 individuals who the first model predicted had any costs. We used an ordinary least squares  
26  
27 (OLS) logistic probit regression in the first step, followed by a generalized linear model with a  
28  
29 generalized Gamma distribution and log link in the second stage. We used the Stata twopm  
30  
31 command developed by Belotti and colleagues to execute the two models<sup>25</sup>. The twopm  
32  
33 command allowed us to use the survey weights provided by AHRQ. Data were collected and  
34  
35 merged using SAS v9.4 analytical software [SAS Institute, Cary, NC]. Data management was  
36  
37 performed in SAS and Stata IC v15 [Stata Corp, College Station, TX]. All data analysis was  
38  
39 conducted using Stata.  
40  
41  
42  
43  
44  
45  
46

47 Our main regression model (Model 1) included personal characteristics and current smoking  
48  
49 status. We experimented with including body mass index in the model; however, the variable had  
50  
51 near 50% missingness, so we excluded it from our final model. (Further sensitivity analysis  
52  
53 indicated that body mass had negligible impact on estimated expenditures by smoking status).  
54  
55  
56  
57  
58  
59  
60

1 We added the disease history to the two-stage model (Model 2). Finally, because COPD  
2 comorbidity was only available for the last three years of the study, we excluded COPD and re-  
3 ran the model on all five years of the study period. Because controlling for this co-morbidity did  
4 not noticeably affect the estimates by smoking status, we chose to report estimates based on 5  
5 years of data, thus increasing our power to probe costs among subgroups. We further expanded  
6 Model 2 to include data on years-since-quit for Former smokers at 1-, 2-, and 5-year  
7 thresholds. Because prevalence of these risk factors changes over the life course, we also  
8 examined the marginal effects of smoking on medical expenditures by decade of adult life<sup>25</sup>.  
9 Non-overlapping confidence intervals indicated statistically significant differences.

## 11 Results

12 An average of 19.7 million adults self-identified as Current smokers in the US from 2011 to  
13 2015. The proportion of current smokers decreased over the study period, to approximately 17.5  
14 million adults in 2015. An average of 43.6 million adults in the U.S. were Ever smokers. The  
15 proportion of former smokers increased through decades of life, peaking over 22% for those  
16 older than 70-years-old. Tables 1a and 1b describe smoking status by study year and decade of  
17 life, respectively. Among the 23.9 million Former smokers, only 4.3% quit within the prior year,  
18 8.7% quit within the prior 2 years, and 24.4% quit within the 5 years prior to the survey.

19  
20 Table 2 displays the costs for American adults in 2011 – 2015 by smoking status. In Model 1,  
21 mean annual medical expenditures for US adults were \$4,830. Costs for adult Never smokers  
22 were below the national average (\$4,360). Former smokers had the highest annual medical  
23 expenses, \$5,590 (28% increase over never smokers). Although Current smokers had lower

1 average costs than Former smokers at \$5,144 (18% increase over Never smokers), the 95%  
2 confidence intervals (CIs) overlap for Current and Former smokers. If we combine Current and  
3 Former smokers into Ever smokers and re-run Model 1, the average costs for someone who has  
4 ever smoked is \$5,400 (95% CI = 5142 – 5659).

5  
6 In Table 3, a sensitivity analysis for Model 2 that includes years-since-quit for former  
7 smokers does not find a direct relationship between time since smoking cessation and medical  
8 expenditures. The mean expenditures by cessation period have small differences, and the 95%  
9 CIs greatly overlap. Table 4 identifies displays how medical expenditures vary across decades of  
10 life by smoking status. The 95% CIs for Never smokers in Table 4 do not contain the estimate  
11 for Former smokers at each decade. The CIs for Former smokers do not contain the estimate for  
12 Never smokers at all decades except for age 20. The 95% CIs for Current smokers at each decade  
13 include both the Never and Former smoker estimates, and the CIs for Never and Former smokers  
14 include the estimate for Current smokers.

15  
16 Multiplying costs by average number of smokers for 2011 – 2015, Current smokers incurred  
17 \$101.4 billion in average annual medical expenses (95% CI = 12.6 billion – 14.1 billion), \$15  
18 billion above the costs for a demographically comparable number of Never smokers. Former  
19 smokers incurred an average of \$133.6 billion in annual medical expenditures (95% CI = 9.28  
20 billion – 110 billion), a \$29 billion increase over comparable Never smokers. Average annual  
21 medical expenditures for Ever smokers are \$235.6 billion (95% CI = 224 billion – 247 billion),  
22 approximately \$45 billion above the costs for a demographically comparable number of Never  
23 smokers.



1  
2  
3 1  
45 2 **Discussion**

6  
7  
8 3 We updated the national estimates for smoking costs in American adults through 2015 using  
9  
10 4 state-of-the-science economic modeling techniques. Our estimates for annual medical  
11  
12 5 expenditures for all civilian non-institutionalized adults was \$4,830 for 2011 – 2015, in 2015  
13  
14 6 USD. This estimate for the study period was close to Mitchell and Machlin's<sup>26</sup> estimate of  
15  
16 7 average total medical expenditures in 2015 using MEPS data (\$4,978). Our estimate for annual  
17  
18 8 expenditures and marginal costs due to smoking are below similar estimates generated using the  
19  
20 9 National Health Expenditure Assessment (NHEA) database<sup>27 28</sup>. However, the NHEA is more  
21  
22 10 comprehensive than the MEPS in capturing Medicaid costs covering institutionalized adults  
23  
24 11 (including those in nursing homes), active-duty military, and foreign visitors to the US <sup>28 29</sup>, so  
25  
26 12 we expected MEPS to yield lower estimates.  
27  
28  
29  
30  
31  
32

33 14 We find that Former smokers have greater annual medical costs over Current and Never  
34  
35 15 smokers; however, the 95% confident intervals overlap for Current and Former smokers in the  
36  
37 16 main model. Surely, some smokers quit after diagnosis of costly health problems linked to  
38  
39 17 smoking, but the cost differential narrows only slightly after controlling for major chronic  
40  
41 18 conditions (many of which are linked to smoking). Especially at younger ages, quitting appears  
42  
43 19 to be more likely to sort smokers by health consciousness and associated use of medical care.  
44  
45  
46  
47  
48

49 21 Some older studies compared medical spending per capita among current, former, and never  
50  
51 22 smokers. Using data from the 1987 National Medical Expenditure Survey (NMES), Miller and  
52  
53 23 colleagues [1999] identified higher annual medical expenditures in former smokers over current  
54  
55  
56  
57  
58  
59  
60

1 smokers. Contrasting with the national studies, two studies using local claims data<sup>30 31</sup> found that  
2 medial expenditures for current and former smokers were nearly identical, with a slight spike in  
3 costs for former smokers immediately following quitting.

4  
5 Some current smokers may experience very high cost medical expenditures over a short period  
6 before dying (and thus not incurring any further costs), while former smokers may continue to  
7 amass lower cost medical encounters. These former smokers would be gaining up to 10 years of  
8 survival and medical expenditures over current smokers<sup>32</sup>. Current smokers also may simply be  
9 doctor-phobic, anxious to avoid yet another lecture about their smoking. The persistence and  
10 perversity of our finding that higher medical expenditures in former smokers at all ages and  
11 regardless of time-since-quitting, suggests exploring the issue using qualitative methods.

12  
13 We followed the methods of Xu and colleagues<sup>5</sup> and Max and colleagues<sup>7-9</sup> to identify current,  
14 former, and never smokers in NHIS/MEPS data. Those studies examined attributable fractions  
15 (AFs) for medical expenditures rather than costs to individuals. The two-part model developed  
16 by Manning and colleagues has become the gold-standard for estimating costs in a skewed  
17 sample, such as medical expenditures<sup>16 33</sup>. It has been used to study the impact of smoking on  
18 healthcare costs across a wide variety of databases<sup>6 34 35</sup>. An analysis from An<sup>6</sup> using the two-  
19 stage model was performed on medical expenditures associated with smoking status (ever vs.  
20 never) and obesity ( $< 30$  BMI vs.  $30 \geq$  BMI) using MEPS data from 1998 to 2011. In contrast to  
21 the present study, An's estimated expenditures did not control for quit status, marital status,  
22 family income, family size, or pregnancy. Our estimated cost differences between ever/never  
23 smokers and obese/non-obese individuals (data not shown) were lower than in the An study. We

1  
2  
3 1 believe that the inclusion of quit status and additional personal characteristics in the two-stage  
4  
5 2 models increases the precision of our estimate over this prior study.  
6  
7  
8 3

9  
10 4 *Limitations and Strengths*

11  
12 5 Many of the prior studies assessing the impact of behavioral risk factors on medical expenditures  
13  
14 6 employ the traditional attributable fraction approach, which constructs costs from selected acute  
15  
16 7 and chronic conditions related to the individual risk factors of interest. This method is  
17  
18 8 appropriate unless a study echoes our aim to examine the marginal effects of the risk behaviors  
19  
20 9 on costs to individuals. Using the two-part model<sup>16</sup>, our study provides a different assessment of  
21  
22 10 medical expenditures than the attributable fraction method. Attributable fraction studies estimate  
23  
24 11 the smoking-related medical costs incurred in treated diseases that resulted from smoking. The  
25  
26 12 two-stage modelling approach instead looks at the overall medical spending of the smoking  
27  
28 13 cohort. It can be strongly influenced by a difference in care-seeking propensity.  
29  
30  
31  
32  
33  
34

35 15 Our estimates for prevalence of smoking (9%) are lower than those found in other surveillance  
36  
37 16 studies. The Behavioral Risk Factor Surveillance System (BRFSS) identified 15% of American  
38  
39 17 adults as current smokers in 2015<sup>36</sup>. This discrepancy between BRFSS and NHIS data may be  
40  
41 18 due to different modes of data collection. While BRFSS collects data through telephone surveys,  
42  
43 19 NHIS collects data via within-household, in-person interviews. Unlike NHIS, BRFSS data  
44  
45 20 collection is de-centralized as is the responsibility of each state health department.  
46  
47  
48  
49  
50

51 22 The goal of this study was to update medical expenditures for smoking to 2015. It was beyond  
52  
53 23 the scope of the study to assess spending by type of medical service utilized. With sufficient  
54  
55  
56  
57  
58  
59  
60

1 budget, doing so might have allowed us to propose more hypotheses as to why certain risks had  
2 increased costs over others, as Sturm<sup>37</sup> did for obesity and problem drinking.

3  
4 In a period of low inflation, we chose to control for inflation in our multi-year analysis of  
5 expenditures by including dummy variables for MEPS year rather than using price adjusters that  
6 assume a fixed market basket of medical services. The dummy variables should account not only  
7 for year-to-year changes in costs, but for other endogenous temporal effects. Those effects  
8 include the many policy features of 2010's Affordable Care Act that went into effect from 2011  
9 to 2015<sup>38</sup>.

### 11 *Conclusion*

12 Our data fill a niche by updating medical expenditures nationwide across current smoking status.  
13 One clear application of our estimates is in computing the medical spending foregone because  
14 behavioral risk-takers have elevated risks of morbidity and mortality. Although tobacco cessation  
15 cause declines in chronic illness, early mortality, and associated costs, it appears they may not  
16 decrease annual medical expenditures per survivor. That finding suggests studies of return on  
17 investment in smoking cessation that use attributable-fraction-based costs may yield skewed  
18 results.

### 20 *Acknowledgement and Funding*

21 The research in this paper was conducted at the CFACT Data Center, and the support of AHRQ  
22 is acknowledged. The results and conclusions in this paper are those of the authors and do not  
23 indicate concurrence by AHRQ or the Department of Health and Human Services.

1 Funding for this project was provided by NHLBI grant AN: 3421751 (Implementation of HIT-  
2 Enhanced Tobacco Treatment for Hospitalized Smokers) and NCI grant R01CA201873  
3 (Optimizing Tobacco Dependence Treatment in the Emergency Department).

4 *Patient and Public Involvement- Cohort Description*

5 The data for this study were obtained from two datasets generated by the U.S. Department of  
6 Health and Human Services: The National Health Interview Survey (NHIS) and the Medical  
7 Expenditure Panel Survey (MEPS). Both surveys are samples of American adults that can be  
8 used to generate weighted estimates of medical care in the U.S. These pre-existing data were not  
9 identified to the researchers, so we could not contact them nor involve them in any aspect of the  
10 study design and analysis.

11 *Data Sharing-*

12 Data used in this study are held by AHRQ and U.S. DHHS and were used by agreement with the  
13 researchers. Raw data used in this study cannot be shared.

14 *Author contributions*

15 SLB, TRM, and DIS conceived of the study. DIS, GW, and TRM designed the analysis. DIS  
16 conducted the analysis. DIS and BA wrote and edited drafts of the manuscript. All authors  
17 provided input on the manuscript and approved of the final draft.

18 *Competing interests:*

19 All authors state that they have no competing interests.

## 1     **References**

- 2
- 3
- 4
- 5
- 6
- 7
- 8     1. U.S. Department of Health and Human Services. The Health Consequences of Smoking—50  
9  
10         Years of Progress: A Report of the Surgeon General. Atlanta, GA: U.S. Department of  
11  
12         Health and Human Services, Centers for Disease Control and Prevention, National Center  
13  
14         for Chronic Disease Prevention and Health Promotion, Office on Smoking and Health,  
15         2014.  
16
- 17
- 18
- 19     2. Warner KE. Cost effectiveness of smoking-cessation therapies. *Pharmacoeconomics*  
20  
21         1997;11(6):538-49. doi: 10.2165/00019053-199711060-00003  
22
- 23
- 24     3. LeBlanc ES, O'Connor E, Whitlock EP, et al. Effectiveness of primary care-relevant  
25  
26         treatments for obesity in adults: A systematic evidence review for the U.S. Preventive  
27  
28         Services Task Force. *Annals of Internal Medicine* 2011;155(7):434-47. doi:  
29  
30         10.7326/0003-4819-155-7-201110040-00006  
31
- 32
- 33     4. Fleming MF, Mundt MP, French MT, et al. Brief physician advice for problem drinkers:  
34  
35         Long-term efficacy and benefit-cost analysis. *Alcohol Clin Exp Res* 2002;26(1):36-43.  
36
- 37
- 38     5. Xu X, Bishop EE, Kennedy SM, et al. Annual healthcare spending attributable to cigarette  
39  
40         smoking: an update. *Am J Prev Med* 2015;48(3):326-33. doi:  
41  
42         10.1016/j.amepre.2014.10.012 [published Online First: 2014/12/17]  
43
- 44
- 45     6. An R. Health care expenses in relation to obesity and smoking among U.S. adults by gender,  
46  
47         race/ethnicity, and age group: 1998-2011. *Public Health* 2015;129(1):29-36. doi:  
48  
49         10.1016/j.puhe.2014.11.003 [published Online First: 2014/12/30]  
50
- 51
- 52
- 53
- 54
- 55
- 56
- 57
- 58
- 59
- 60

- 1 7. Max W, Sung HY, Shi Y, et al. The cost of smoking in California. *Nicotine & Tobacco*  
2  
3  
4  
5  
6 2 *Research* 2016;18(5):1222-9. doi: 10.1093/ntr/ntv123 [published Online First:  
7  
8 3 2015/07/15]
- 9  
10 4 8. Max W, Rice D, Sung H, et al. The economic burden of smoking in California. *Tob Control*  
11  
12 5 2004;13(3):264-67.
- 13  
14  
15 6 9. Max W, Sung H-Y, Shi Y, et al. The Cost of Smoking in California, 2009. San Francisco, CA:  
16  
17 7 Institute for Health & Aging, University of California, San Francisco, 2014.
- 18  
19 8 10. Rockhill B, Newman B, Weinberg C. Use and misuse of population attributable fractions.  
20  
21 9 *AJPH* 1998;88(1):15-19.
- 22  
23  
24 10 11. Lavelle TA, Kent DM, Lundquist CM, et al. Patient variability seldom assessed in cost-  
25  
26 11 effectiveness studies. *Med Decis Making* 2018;38(4):487-94.
- 27  
28 12 12. Trogon JG, Finkelstein EA, Hoefler TJ. Research Brief: Use of econometric models to  
29  
30 13 estimate expenditure shares. *Health Services Research* 2008;43:4(4):1442- 52. doi:  
31  
32 14 10.1111/j.1475-6773.2007.00827.x
- 33  
34  
35 15 13. Tangka FK, Trogon JG, Richardson LC, et al. Cancer treatment cost in the United States:  
36  
37 16 has the burden shifted over time? *Cancer* 2010;116(14):3477-84. doi:  
38  
39 17 10.1002/cncr.25150 [published Online First: 2010/06/22]
- 40  
41  
42 18 14. Heidenreich PA, Trogon JG, Khavjou OA, et al. Forecasting the future of cardiovascular  
43  
44 19 disease in the United States: A policy statement from the American Heart Association.  
45  
46 20 *Circulation* 2011;123(8):933-44. doi: 10.1161/CIR.0b013e31820a55f5,  
47  
48 21 CIR.0b013e31820a55f5 [pii] [published Online First: 2011/01/26]
- 49  
50  
51 22 15. Florence CS, Zhou C, Luo F, et al. The economic burden of prescription opioid overdose,  
52  
53 23 abuse, and dependence in the United States, 2013. *Medical Care* 2016;54(10):901-06.
- 54  
55  
56  
57  
58  
59  
60

- 1  
2  
3 1 doi: 10.1097/MLR.0000000000000625, 00005650-201610000-00002 [pii] [published  
4  
5 2 Online First: 2016/09/14]  
6  
7  
8 3 16. Manning WG, Basu A, Mullahy J. Generalized modeling approaches to risk adjustment of  
9  
10 4 skewed outcomes data. *Journal of Health Economics* 2005;24(3):465-88. doi:  
11  
12 5 10.1016/j.jhealeco.2004.09.011 [published Online First: 2005/04/07]  
13  
14  
15 6 17. Jackson CA, Manning WG, Jr., Wells KB. Impact of prior and current alcohol use on use of  
16  
17 7 services by patients with depression and chronic medical illnesses. *Health Serv Res*  
18  
19 8 1995;30(5):687-705. [published Online First: 1995/12/01]  
20  
21  
22 9 18. Butler CC, Pill R, Stott NCH. Qualitative study of patients' perceptions of doctors' advice to  
23  
24 10 quit smoking: implications for opportunistic health promotion. *BMJ*  
25  
26 11 1998;316(7148):1878-81. doi: 10.1136/bmj.316.7148.1878  
27  
28  
29 12 19. National Center for Health Statistics. National Health Interview Survey 2018 [Available  
30  
31 13 from: <https://www.cdc.gov/nchs/nhis/index.htm>.  
32  
33  
34 14 20. Agency for Healthcare Research and Quality. Medical Expenditure Panel Survey 2018  
35  
36 15 [Available from: <https://meps.ahrq.gov/mepsweb/>.  
37  
38 16 21. Sengupta N, Nichol MB, Wu J, et al. Mapping the SF-12 to the HUI3 and VAS in a Managed  
39  
40 17 Care Population. *Medical Care* 2004;42(9):927-37. doi:  
41  
42 18 10.1097/01.mlr.0000135812.52570.42  
43  
44  
45 19 22. Arroll B, Goodyear-Smith F, Crengle S, et al. Validation of PHQ-2 and PHQ-9 to screen for  
46  
47 20 major depression in the primary care population. *Ann Fam Med* 2010;8(4):348-53. doi:  
48  
49 21 10.1370/afm.1139 [published Online First: 2010/07/21]  
50  
51  
52  
53  
54  
55  
56  
57  
58  
59  
60



- 1  
2  
3 1 23. Kessler RC, Barker PR, Colpe LJ, et al. Screening for serious mental illness in the general  
4  
5 2 population. *Archives of General Psychiatry* 2003;60(2):184-89. doi:  
6  
7 3 10.1001/archpsyc.60.2.184  
8  
9  
10 4 24. Elixhauser A, Steiner C, Harris D, et al. Comorbidity measures for use with administrative  
11  
12 5 data. *Medical Care* 1998;36(1):8-27.  
13  
14  
15 6 25. Belotti F, Deb P, Manning WG, et al. twopm: Two-part models. *Stata J* 2015;15(1):3-20.  
16  
17 7 26. Mitchell E, Machlin S. Concentration of health expenditures and selected characteristics of  
18  
19 8 high spenders, U.S. civilian noninstitutionalized population, 2015. Statistical Brief #506.  
20  
21 9 Rockville, MD: Agency for Healthcare Research and Quality, 2017.  
22  
23  
24 10 27. Lassman D, Hartman M, Washington B, et al. US health spending trends by age and gender:  
25  
26 11 Selected years 2002–10. *Health Affairs* 2014;33(5):815-22.  
27  
28  
29 12 28. Finkelstein EA, Trogon JG, Cohen JW, et al. Annual medical spending attributable to  
30  
31 13 obesity: Payer- and service-specific estimates. *Health Aff* 2009;28(5):w822-w31. doi:  
32  
33 14 10.1377/hlthaff.28.5.w822 [published Online First: 2009/07/29]  
34  
35  
36 15 29. Sing M, Banthin JS, Selden TM, et al. Reconciling medical expenditure estimates from the  
37  
38 16 MEPS and NHEA, 2002. *Health Care Financing Review* 2006;28(1):25-40.  
39  
40  
41 17 30. Fishman PA, Khan ZM, Thompson EE, et al. Health care costs among smokers, former  
42  
43 18 smokers, and never smokers in an HMO. *Health Services Research* 2003;38(2):733-49.  
44  
45 19 doi: 10.1111/1475-6773.00142  
46  
47 20 31. Hockenberry JM, Curry SJ, Fishman PA, et al. Healthcare costs around the time of smoking  
48  
49 21 cessation. *Am J Prev Med* 2012;42(6):596-601. doi: 10.1016/j.amepre.2012.02.019  
50  
51  
52  
53  
54  
55  
56  
57  
58  
59  
60

- 1  
2  
3 1 32. Jha P, Ramasundarahettige C, Landsman V, et al. 21st-century hazards of smoking and  
4  
5 2 benefits of cessation in the United States. *New England J Med* 2013;368(4):341-50. doi:  
6  
7 3 10.1056/NEJMsa1211128 [published Online First: 2013/01/25]  
8  
9  
10 4 33. Buntin MB, Zaslavsky AM. Too much ado about two-part models and transformation?  
11  
12 5 Comparing methods of modeling Medicare expenditures. *Journal of Health Economics*  
13  
14 6 2004;23(3):525-42.  
15  
16  
17 7 34. Coughlan D, Yeh ST, O'Neill C, et al. Evaluating direct medical expenditures estimation  
18  
19 8 methods of adults using the medical expenditure panel survey: An example focusing on  
20  
21 9 head and neck cancer. *Value Health* 2014;17(1):90-7. doi: 10.1016/j.jval.2013.10.004  
22  
23 10 [published Online First: 2014/01/21]  
24  
25  
26 11 35. Baumeister SE, Böger CA, Krämer BK, et al. Effect of chronic kidney disease and comorbid  
27  
28 12 conditions on health care costs: A 10-year observational study in a general population.  
29  
30 13 *Am J Nephrol* 2010;31(3):222-29.  
31  
32  
33 14 36. Jamal A, King B, Neff L, et al. Current cigarette smoking among adults—United States,  
34  
35 15 2005–2015. *MMWR* 2016;65:1205–11. doi: <http://dx.doi.org/10.15585/mmwr.mm6544a2>  
36  
37  
38 16 37. Sturm R. The effects of obesity, smoking, and drinking on medical problems and costs.  
39  
40 17 *Health Affairs* 2002;21(2):245-53.  
41  
42  
43 18 38. French MT, Homer J, Gumus G, et al. Key provisions of the patient protection and  
44  
45 19 Affordable Care Act (ACA): A systematic review and presentation of early research  
46  
47 20 findings. *Health Services Research* 2016;51(5):1735-71. doi: 10.1111/1475-6773.12511  
48  
49  
50  
51  
52  
53  
54  
55  
56  
57  
58  
59  
60

1 **Table 1.** Prevalence of smoking by year of MEPS data collection (a) and decade of age (b).  
 2 Average participants in each category were developed using survey weights.

| Table 1a | Smoking status by year of medical expenditure |       |       |       |       | n           |
|----------|-----------------------------------------------|-------|-------|-------|-------|-------------|
|          | 2011                                          | 2012  | 2013  | 2014  | 2015  |             |
| Current  | 7.7%                                          | 8.7%  | 8.4%  | 7.9%  | 7.3%  | 19,716,719  |
| Never    | 83.7%                                         | 81.6% | 81.6% | 81.6% | 82.4% | 206,862,703 |
| Former   | 8.6%                                          | 9.7%  | 10.0% | 10.5% | 10.3% | 23,900,571  |
| Table 1b | Smoking status by decade of life              |       |       |       |       |             |
|          | 18-30                                         | 31-40 | 41-50 | 51-60 | 61-70 | 70+         |
| Current  | 6.8%                                          | 9.8%  | 9.2%  | 9.6%  | 7.4%  | 4.4%        |
| Never    | 90.5%                                         | 83.2% | 83.8% | 79.8% | 76.8% | 73.3%       |
| Former   | 2.7%                                          | 7.0%  | 7.1%  | 10.6% | 15.7% | 22.3%       |

**Table 2.** Results of the two-part model for smoking status on mean medical expenditures per year, 2011 – 2015, in 2015 US\$. Model 1 included smoking and personal characteristics only <sup>a</sup>. Model 2 included personal characteristics, smoking, and comorbidities <sup>b</sup>. (CI = Confidence interval)

|                | Model 1   |                 | Model 2   |                 |
|----------------|-----------|-----------------|-----------|-----------------|
|                | Mean cost | 95% CI          | Mean cost | 95% CI          |
| Never Smoker   | \$4,360   | 4154.3 - 4566.3 | \$4,499   | 4219.6 - 4778.9 |
| Current Smoker | \$5,144   | 4707.9 - 5580.3 | \$4,647   | 4186.9 - 5107.0 |
| Former Smoker  | \$5,590   | 5267.4 - 5913.5 | \$5,012   | 4618.4 - 5406.4 |

<sup>a</sup> Covariates included in Model 1 were age (continuous), gender, race/ethnicity (White, African American, Asian, Hispanic origin, Other), education (No high school degree, High school or some college, At least college graduate), marital status (Single/Never married, Current married, Widowed/Divorced/Separated), Pregnancy in the prior year, employment status (Unemployed, Employed, Full-time student, Never worked, Retired), logged-total family income, insurance status (Private, Any public insurance (under age 65), Medicare/Medicaid+, Uninsured), family size, year dummy variables, any binge drinking in the prior year, and BMI (Normal weight or Underweight, Overweight or Obese).

<sup>b</sup> In addition to the variables in Model 1, a history of the following conditions were added to Model 2: any cancer, diabetes, asthma, arthritis, cardiovascular disease (angina, coronary heart disease, myocardial infarction, or stroke), emphysema, quality of life calculated from Short Form 12, depression calculated from the Personal Health Questionnaire, and mental illness from the Kessler 6 questionnaire.

1 **Table 3.** Results of separate runs of the two-part model of mean medical expenditures for  
2 Former smokers using 1-, 2-, and 5-year thresholds for years-since-quitting smoking. (CI =  
3 Confidence interval) in 2015 US\$.

| Years since quitting | Mean    | 95% CI          |
|----------------------|---------|-----------------|
| 1 or fewer years     | \$5,036 | 3604.4 - 6646.6 |
| More than 1 year     | \$5,006 | 4588.8 - 5422.3 |
| 2 or fewer years     | \$5,132 | 4035.0 - 6229.6 |
| More than 2 years    | \$4,986 | 4543.6 - 5429.1 |
| 5 or fewer years     | \$4,957 | 4182.8 - 5730.7 |
| More than 5 years    | \$5,028 | 4551.1 - 5505.2 |

4  
15  
16  
17  
18  
19  
20  
21  
22  
23  
24  
25  
26  
27  
28  
29  
30  
31  
32  
33  
34  
35  
36  
37  
38  
39  
40  
41  
42  
43  
44  
45  
46  
47  
48  
49  
50  
51  
52  
53  
54  
55  
56  
57  
58  
59  
60

For peer review only

**Table 4.** Average annual medical expenditures in 2011 – 2015 for American adults of selected ages by smoking status, from a two-part model including personal characteristics and disease history at each decade of life ages 20 – 80, in 2015 US\$.

| Smoking status | Age      |              |          |              |          |              |          |              |
|----------------|----------|--------------|----------|--------------|----------|--------------|----------|--------------|
|                | 20       |              | 30       |              | 40       |              | 50       |              |
|                | Estimate | 95% CI       |
| Never          | \$2,743  | (2366, 3151) | \$3,214  | (2857, 3571) | \$3,763  | (3472, 4054) | \$4,401  | (4160, 4642) |
| Current        | \$2,909  | (2390, 3428) | \$3,413  | (2928, 3897) | \$4,000  | (3561, 4438) | \$4,683  | (4284, 5081) |
| Former         | \$3,208  | (2704, 3711) | \$3,754  | (3301, 4208) | \$4,390  | (3947, 4783) | \$5,130  | (4776, 5483) |
| Smoking status | Age      |              |          |              |          |              |          |              |
|                | 60       |              | 70       |              | 80       |              |          |              |
|                | Estimate | 95% CI       | Estimate | 95% CI       | Estimate | 95% CI       |          |              |
| Never          | \$5,143  | (4846, 5440) | \$6,007  | (5505, 6508) | \$7,010  | (6184, 7836) |          |              |
| Current        | \$5,478  | (5059, 5897) | \$6,403  | (5839, 6968) | \$7,479  | (6627, 8331) |          |              |
| Former         | \$5,990  | (5574, 6407) | \$6,990  | (6357, 7623) | \$8,153  | (7160, 9145) |          |              |

4

**CHEERS Checklist****Items to include when reporting economic evaluations of health interventions**

The ISPOR CHEERS Task Force Report, *Consolidated Health Economic Evaluation Reporting Standards (CHEERS)—Explanation and Elaboration: A Report of the ISPOR Health Economic Evaluations Publication Guidelines Good Reporting Practices Task Force*, provides examples and further discussion of the 24-item CHEERS Checklist and the CHEERS Statement. It may be accessed via the *Value in Health* or via the ISPOR Health Economic Evaluation Publication Guidelines – CHEERS: Good Reporting Practices webpage: <http://www.ispor.org/TaskForces/EconomicPubGuidelines.asp>

| Section/item                    | Item No | Recommendation                                                                                                                                                                             | Reported on page No/line No |
|---------------------------------|---------|--------------------------------------------------------------------------------------------------------------------------------------------------------------------------------------------|-----------------------------|
| <b>Title and abstract</b>       |         |                                                                                                                                                                                            |                             |
| Title                           | 1       | Identify the study as an economic evaluation or use more specific terms such as “cost-effectiveness analysis”, and describe the interventions compared.                                    | <u>Title Page</u>           |
| Abstract                        | 2       | Provide a structured summary of objectives, perspective, setting, methods (including study design and inputs), results (including base case and uncertainty analyses), and conclusions.    | <u>P1 Line 2-19</u>         |
| <b>Introduction</b>             |         |                                                                                                                                                                                            |                             |
| Background and objectives       | 3       | Provide an explicit statement of the broader context for the study.<br>Present the study question and its relevance for health policy or practice decisions.                               | <u>P1-2</u>                 |
| <b>Methods</b>                  |         |                                                                                                                                                                                            |                             |
| Target population and subgroups | 4       | Describe characteristics of the base case population and subgroups analysed, including why they were chosen.                                                                               | <u>P4 LG-16</u>             |
| Setting and location            | 5       | State relevant aspects of the system(s) in which the decision(s) need(s) to be made.                                                                                                       | <u>N/A</u>                  |
| Study perspective               | 6       | Describe the perspective of the study and relate this to the costs being evaluated.                                                                                                        | <u>P4 L7</u>                |
| Comparators                     | 7       | Describe the interventions or strategies being compared and state why they were chosen.                                                                                                    | <u>P4 11-16</u>             |
| Time horizon                    | 8       | State the time horizon(s) over which costs and consequences are being evaluated and say why appropriate.                                                                                   | <u>B-P4</u>                 |
| Discount rate                   | 9       | Report the choice of discount rate(s) used for costs and outcomes and say why appropriate.                                                                                                 | <u>P11 L16-21</u>           |
| Choice of health outcomes       | 10      | Describe what outcomes were used as the measure(s) of benefit in the evaluation and their relevance for the type of analysis performed.                                                    | <u>N/A</u>                  |
| Measurement of effectiveness    | 11a     | <i>Single study-based estimates:</i> Describe fully the design features of the single effectiveness study and why the single study was a sufficient source of clinical effectiveness data. | <u>N/A</u>                  |



1  
2  
3  
4  
5  
6  
7  
8  
9  
10  
11  
12  
13  
14  
15  
16  
17  
18  
19  
20  
21  
22  
23  
24  
25  
26  
27  
28  
29  
30  
31  
32  
33  
34  
35  
36  
37  
38  
39  
40  
41  
42  
43  
44  
45  
46  
47  
48  
49  
50  
51  
52  
53  
54  
55  
56  
57  
58  
59  
60

|                                                        |     |                                                                                                                                                                                                                                                                                                                                                       |                   |
|--------------------------------------------------------|-----|-------------------------------------------------------------------------------------------------------------------------------------------------------------------------------------------------------------------------------------------------------------------------------------------------------------------------------------------------------|-------------------|
|                                                        | 11b | <i>Synthesis-based estimates:</i> Describe fully the methods used for identification of included studies and synthesis of clinical effectiveness data.                                                                                                                                                                                                | <u>N/A</u>        |
| Measurement and valuation of preference based outcomes | 12  | If applicable, describe the population and methods used to elicit preferences for outcomes.                                                                                                                                                                                                                                                           | <u>N/A</u>        |
| Estimating resources and costs                         | 13a | <i>Single study-based economic evaluation:</i> Describe approaches used to estimate resource use associated with the alternative interventions. Describe primary or secondary research methods for valuing each resource item in terms of its unit cost. Describe any adjustments made to approximate to opportunity costs.                           | <u>—</u>          |
|                                                        | 13b | <i>Model-based economic evaluation:</i> Describe approaches and data sources used to estimate resource use associated with model health states. Describe primary or secondary research methods for valuing each resource item in terms of its unit cost. Describe any adjustments made to approximate to opportunity costs.                           | <u>P4-6</u>       |
| Currency, price date, and conversion                   | 14  | Report the dates of the estimated resource quantities and unit costs. Describe methods for adjusting estimated unit costs to the year of reported costs if necessary. Describe methods for converting costs into a common currency base and the exchange rate.                                                                                        | <u>P11</u>        |
| Choice of model                                        | 15  | Describe and give reasons for the specific type of decision-analytical model used. Providing a figure to show model structure is strongly recommended.                                                                                                                                                                                                | <u>P2-3</u>       |
| Assumptions                                            | 16  | Describe all structural or other assumptions underpinning the decision-analytical model.                                                                                                                                                                                                                                                              | <u>P2,3,6</u>     |
| Analytical methods                                     | 17  | Describe all analytical methods supporting the evaluation. This could include methods for dealing with skewed, missing, or censored data; extrapolation methods; methods for pooling data; approaches to validate or make adjustments (such as half cycle corrections) to a model; and methods for handling population heterogeneity and uncertainty. | <u>P2-6,10,11</u> |
| <b>Results</b>                                         |     |                                                                                                                                                                                                                                                                                                                                                       |                   |
| Study parameters                                       | 18  | Report the values, ranges, references, and, if used, probability distributions for all parameters. Report reasons or sources for distributions used to represent uncertainty where appropriate. Providing a table to show the input values is strongly recommended.                                                                                   | <u>P7, T1</u>     |
| Incremental costs and outcomes                         | 19  | For each intervention, report mean values for the main categories of estimated costs and outcomes of interest, as well as mean differences between the comparator groups. If applicable, report incremental cost-effectiveness ratios.                                                                                                                | <u>T1</u>         |
| Characterising uncertainty                             | 20a | <i>Single study-based economic evaluation:</i> Describe the effects of sampling uncertainty for the estimated incremental cost and incremental effectiveness parameters, together with the impact                                                                                                                                                     | <u>T2-4</u>       |





|                                                                      |     |                                                                                                                                                                                                                                                                            |        |
|----------------------------------------------------------------------|-----|----------------------------------------------------------------------------------------------------------------------------------------------------------------------------------------------------------------------------------------------------------------------------|--------|
|                                                                      |     | of methodological assumptions (such as discount rate, study perspective).                                                                                                                                                                                                  |        |
|                                                                      | 20b | <i>Model-based economic evaluation</i> : Describe the effects on the results of uncertainty for all input parameters, and uncertainty related to the structure of the model and assumptions.                                                                               |        |
| Characterising heterogeneity                                         | 21  | If applicable, report differences in costs, outcomes, or cost-effectiveness that can be explained by variations between subgroups of patients with different baseline characteristics or other observed variability in effects that are not reducible by more information. | N/A    |
| <b>Discussion</b>                                                    |     |                                                                                                                                                                                                                                                                            |        |
| Study findings, limitations, generalisability, and current knowledge | 22  | Summarise key study findings and describe how they support the conclusions reached. Discuss limitations and the generalisability of the findings and how the findings fit with current knowledge.                                                                          | P45-11 |
| <b>Other</b>                                                         |     |                                                                                                                                                                                                                                                                            |        |
| Source of funding                                                    | 23  | Describe how the study was funded and the role of the funder in the identification, design, conduct, and reporting of the analysis. Describe other non-monetary sources of support.                                                                                        | P12    |
| Conflicts of interest                                                | 24  | Describe any potential for conflict of interest of study contributors in accordance with journal policy. In the absence of a journal policy, we recommend authors comply with International Committee of Medical Journal Editors recommendations.                          |        |

For consistency, the CHEERS Statement checklist format is based on the format of the CONSORT statement checklist

The **ISPOR CHEERS Task Force Report** provides examples and further discussion of the 24-item CHEERS Checklist and the CHEERS Statement. It may be accessed via the *Value in Health* link or via the ISPOR Health Economic Evaluation Publication Guidelines – CHEERS: Good Reporting Practices webpage: <http://www.ispor.org/TaskForces/EconomicPubGuidelines.asp>

The citation for the CHEERS Task Force Report is:

Husereau D, Drummond M, Petrou S, et al. Consolidated health economic evaluation reporting standards (CHEERS)—Explanation and elaboration: A report of the ISPOR health economic evaluations publication guidelines good reporting practices task force. *Value Health* 2013;16:231-50.



# BMJ Open

## National medical expenditures by smoking status in American adults: an application of Manning's two-stage model to nationally-representative data

|                                 |                                                                                                                                                                                                                                                                                                                                                                    |
|---------------------------------|--------------------------------------------------------------------------------------------------------------------------------------------------------------------------------------------------------------------------------------------------------------------------------------------------------------------------------------------------------------------|
| Journal:                        | <i>BMJ Open</i>                                                                                                                                                                                                                                                                                                                                                    |
| Manuscript ID                   | bmjopen-2018-026592.R2                                                                                                                                                                                                                                                                                                                                             |
| Article Type:                   | Research                                                                                                                                                                                                                                                                                                                                                           |
| Date Submitted by the Author:   | 11-Jun-2019                                                                                                                                                                                                                                                                                                                                                        |
| Complete List of Authors:       | Swedler, David; Pacific Institute for Research and Evaluation, Miller, Ted; Pacific Institute for Research and Evaluation; Curtin University - Perth City Campus<br>Ali, Bina; Pacific Institute for Research and Evaluation<br>Waeher, Geetha; Pacific Institute for Research and Evaluation<br>Bernstein, Steven L.; Yale School of Medicine, Emergency Medicine |
| <b>Primary Subject Heading</b>: | Smoking and tobacco                                                                                                                                                                                                                                                                                                                                                |
| Secondary Subject Heading:      | Health economics, Health services research                                                                                                                                                                                                                                                                                                                         |
| Keywords:                       | HEALTH ECONOMICS, PUBLIC HEALTH, STATISTICS & RESEARCH METHODS, Affordable Care Act                                                                                                                                                                                                                                                                                |
|                                 |                                                                                                                                                                                                                                                                                                                                                                    |

SCHOLARONE™  
Manuscripts

1  
2  
3 **1 National medical expenditures by smoking status in American adults: an application of**  
4 **2 Manning's two-stage model to nationally-representative data**  
5  
6 **3**

7 **4 David I. Swedler, PhD<sup>1</sup>**

8 **5 Ted R. Miller, PhD<sup>1,2</sup>**

9 **6 Bina Ali, PhD<sup>1</sup>**

10 **7 Geetha Waecher, PhD<sup>1</sup>**

11 **8 Steven L. Bernstein, MD<sup>3</sup>**

12 **9**  
13 **10**  
14 **11**  
15 **12**  
16 **13**  
17 **14**  
18 **15**  
19 **16**  
20 **17**  
21 **18**  
22 **19**  
23 **20**  
24 **21**  
25 **22**  
26 **23**  
27 **24**  
28 **25**  
29 **26**  
30 **27**  
31 **28**  
32 **29**  
33 **30**  
34 **31**  
35 **32**  
36 **33**  
37 **34**  
38 **35**  
39 **36**  
40 **37**  
41 **38**  
42 **39**  
43 **40**  
44 **41**  
45 **42**  
46 **43**  
47 **44**  
48 **45**  
49 **46**  
50 **47**  
51 **48**  
52 **49**  
53 **50**  
54 **51**  
55 **52**  
56 **53**  
57 **54**  
58 **55**  
59 **56**  
60 **57**

<sup>1</sup> Pacific Institute for Research and Evaluation, Calverton, MD, USA

<sup>2</sup> Curtin University School of Public Health, Perth, Australia

<sup>3</sup> Department of Emergency Medicine, Yale School of Medicine; Department of Health Policy,  
Yale School of Public Health, New Haven, CT, USA

Corresponding Author: David Swedler  
Pacific Institute for Research and Evaluation  
11720 Beltsville Dr., Ste. 900  
Calverton, MD 20705, United States of America  
phone: 1-301-755-2446  
fax: 1-301-755-2799  
[dswedler@pire.org](mailto:dswedler@pire.org)

**Word Count:** 2693

**Reference Count:** 38

**Keywords:** economics; quit status; age effects; MEPS

## 1 **Abstract**

2 **Objectives:** To assess the medical expenditures of American adults by their smoking status-  
3 Current, Former, or Never smokers. We update these expenditures through 2015 controlling for  
4 personal characteristics and medical history and assess the impact of years-since-quit and  
5 decade of life. **Setting and participants:** Weighted sample of American adults, 2011 – 2015.  
6 The linked National Health Interview Survey (NHIS) and Medical Expenditure Panel Survey  
7 (MEPS) are annual weighted representations of approximately 250 million adults. Sampling of  
8 NHIS is multistage with data collected throughout the year. **Primary outcome measures:** Using  
9 data from NHIS and MEPS, we collected demographic data, self-reported medical history, and  
10 current smoking status. Smoking status was designated as Never, Current, and Former, along  
11 with years-since-quit. Total medical expenditures were collected from MEPS for 2011 –  
12 2015. We used Manning’s two-part model to estimate average expenditures per individual and  
13 marginal costs for individuals at all levels of smoking status. **Results:** American adults averaged  
14 \$4,830 in average medical expenditures. Never smokers (\$4,360, 95% CI = 4154.3 – 4566.3),  
15 had lower expenditures than Current (\$5,244, 95% CI = 4707.9 – 5580.3) and Former (\$5,590,  
16 95% CI = 5267.4 – 5913.5) smokers. Confidence intervals for Current and Former smokers  
17 overlapped. Results were similarly significant when controlling for disease history. Years-since-  
18 quitting did not affect expenditures. In each decade of adult life, Former smokers had the highest  
19 annual medical expenditures, followed by Current and then Never smokers. **Conclusions:** We  
20 updated annual medical expenditures during the Affordable Care Act-era by smoking status  
21 using the current best practice model. While we identify Former smokers as having higher  
22 medical expenditures than Current smokers, we do not examine how care-seeking behavior  
23 varies between levels of each risk factor.

1  
2  
3 **1 Article Summary**  
4

5 **2 *Strengths and Limitations***  
6

- 7
- 8 3 • By using data from 2011 – 2015, this is the first study to report medical expenditure by  
9  
10 4 smoking status while major provisions of the Affordable Care Act took effect.  
11
- 12 5 • We use the gold standard two-part model developed by Manning to estimate medical  
13  
14 6 expenditures from the MEPS and NHIS surveys.  
15
- 16  
17 7 • We analyzed medical expenditures for Current smokers and Former smokers- both  
18  
19 8 separately and combined- across decades of life.  
20
- 21  
22 9 • Although we controlled for history of comorbidities, the data do not contain any  
23  
24 10 information on reason-for-quitting among former smokers.  
25
- 26  
27 11 • The cost differences observed incorporate any differences between the groups in care-  
28  
29 12 seeking for conditions unrelated to smoking.  
30  
31 13
- 32  
33  
34  
35  
36  
37  
38  
39  
40  
41  
42  
43  
44  
45  
46  
47  
48  
49  
50  
51  
52  
53  
54  
55  
56  
57  
58  
59  
60

## 1 Introduction

2 It is well-established that smoking can lead to medical conditions requiring acute and chronic  
3 treatment<sup>1</sup>. Accurate marginal costs for medical risk factors are important when conducting  
4 benefit-cost analyses for health risk behavior interventions<sup>2-4</sup>. The most recent national estimates  
5 of medical expenditures by smoking status have only considered a binary smoking variable:  
6 current smokers versus current non-smokers<sup>5 6</sup>. Further, none of these national studies have  
7 analyzed medical expenditure data more recently than 2011. Since that time, major reforms have  
8 been implemented to the medical care systems in the United State (US).<sup>7</sup>

9  
10 A series of state-level analyses by Max and colleagues<sup>8-10</sup> described medical costs in California  
11 by current, former, and never smokers. The California studies used the attributable fraction (AF)  
12 method to allocate medical expenditures. In their review of the AF method, Rockhill and  
13 colleagues define attributable fraction and similarly-phrased terms to be “the proportion of  
14 disease risk in a population that can be attributed to the causal effects of a risk factor or set of  
15 factors,” (p. 15)<sup>11</sup>. Rockhill *et al* find that the AF method has limitations, including that it is  
16 constrained by how accurately costs are allocated among diagnoses and by the availability of  
17 accurate AFs that are not confounded by co-occurring risk factors<sup>11</sup>. The negative outcomes that  
18 smokers experience vary widely in nature and timing. Importantly, the method does not measure  
19 the standard error for the mean estimated cost per risk-taker<sup>12</sup>.

20  
21 In summary, the AF method has too much uncertainty in risk factor allocation as well as  
22 calculation of standard errors. In analyzing the costs of medical conditions, health economics  
23 literature has largely shifted from this AF method to analyses of annual per capita medical

1 spending of people with the condition relative to a comparison group<sup>13-16</sup>. This approach,  
2 pioneered by Willard Manning<sup>17</sup> captures both mean and standard error and it accounts for  
3 complications that may not be coded to the underlying condition. That is, these equations take a  
4 more holistic view of medical care and expenditures associated with risk factors' coefficients  
5 than would a process seeking to attribute specified treatment costs to specified factors. It allows  
6 that medical visits for conditions related to the behavioral risk factors may displace other medical  
7 care that might be sought if an individual did not have a given risk factor. For example, a doctor  
8 who is scheduling quarterly visits to manage diabetes is unlikely to separately schedule the  
9 annual well-care visit recommended for a healthier patient. That well-care visit gets coded as a  
10 chronic care visit even though it may not raise annual medical spending<sup>18</sup>.

11  
12 While the Manning model is now the gold standard for working with skewed outcomes like  
13 medical spending, it is an imperfect tool. Although it statistically assigns costs to given risk  
14 factors or medical conditions, it does not tell us the "why" behind each individual medical  
15 encounter or expense. Medical spending is influenced by care-seeking behavior. Smokers may  
16 avoid visiting the doctor because it is uncomfortable to report their continued smoking behavior  
17 or tedious to hear the doctor urge them to change<sup>19</sup>. Health consciousness and associated use of  
18 preventive care may be below-average for people who engage in risky behavior. Furthermore,  
19 drinking heavily may be a symptom of life management issues that reduce care-seeking. Those  
20 differences in health management may mask the impacts of risk behavior on medical spending.

21  
22 *Purpose*

1 This study updates the national estimates during the implementation of many major provisions of  
2 the Patient Protection and Affordable Care Act (ACA) for annual medical expenditures of adult  
3 Americans by their current smoking status. We examine medical expenditure data for 2011 –  
4 2015 and apply the cutting-edge two-stage Manning model to more accurately assess error  
5 around mean expenditures.

## 7 **Methods**

### 8 *Data Collection*

9 We analyzed data on smoking status from the National Health Interview Survey (NHIS)<sup>20</sup>. The  
10 NHIS is an annual, cross-sectional survey designed to monitor health and behaviors of civilian,  
11 non-institutionalized Americans through a nationally-representative sample. The Medical  
12 Expenditure Panel Survey (MEPS) tracks a nationally representative subsample of NHIS  
13 participants for 24 months starting in the year after their NHIS interview. MEPS collects five  
14 rounds of data per respondent on healthcare visits and expenditures<sup>21</sup>. It captures all payments  
15 for care, regardless of source, and models costs for visits without payment data including charity  
16 care and visits bundled into capitated care. We used 2011-2015 MEPS data on total medical  
17 expenditures from the individual perspective for adults 18-years and older and the corresponding  
18 NHIS 2009 – 2014 data. Annual medical expenditures were inflated to 2015 US dollars (USD)  
19 using the Personal Consumption Expenditures- Medical Care. We linked data from MEPS and  
20 NHIS via the Agency for Health Care Quality Data Center, as Xu *et al*<sup>5</sup> did in their analyses of  
21 smoking costs<sup>6</sup>. Because our use of the publicly-available data adhered to the government's  
22 privacy restrictions, the project was given an Exemption by the Institutional Review Board of the  
23 Pacific Institute for Research and Evaluation prior to data analysis.



1  
2  
3 1  
4  
5 2 Smoking status was identified through the NHIS Supplemental Adult Questionnaire (SAQ). Like  
6  
7  
8 3 earlier studies, we identified Ever smokers as participants who smoked at least 100 cigarettes in  
9  
10 4 their lifetimes. We defined all others as Never smokers<sup>6</sup>. Ever smokers were further subdivided  
11  
12 5 into those who reported quitting smoking, Former smokers, versus those who did not report  
13  
14 6 quitting, Current smokers<sup>8-10</sup>. For Former smokers, we also identified years-since-quitting.  
15  
16  
17 7

18  
19 8 To conduct regressions, we included the following demographic and behavioral characteristics:  
20  
21 9 age, sex, race/ethnicity, marital status, total family income, family size, employment status,  
22  
23 10 marital status, self-reported binge drinking status, body mass index (BMI), recent pregnancy,  
24  
25 11 education level, employment, and insurance data from MEPS. Age was employed as a  
26  
27 12 continuous variable in the main analyses and divided into ten-year blocks in the age-specific  
28  
29 13 sensitivity analysis. Binge drinking data were also obtained from the SAQ, which used the  
30  
31 14 accepted binge drinking definition of men having 5 or more drinks and women having 4 or more  
32  
33 15 drinks. Those participants who indicated that they had 12 or more instances of binge drinking in  
34  
35 16 the past year were categorized as frequent binge drinkers, and those who had 1-11 instances were  
36  
37 17 categorized as infrequent binge drinkers. BMI data were calculated from self-reported weight  
38  
39 18 and height in the NHIS. We dichotomized BMI into obese for those with a BMI of 30 kg/m<sup>2</sup> or  
40  
41 19 greater, and not obese for those with lower BMI. We refer to these variables collectively as  
42  
43 20 personal characteristics.  
44  
45  
46  
47  
48  
49 21

50  
51 22 NHIS and MEPS had data on self-reported diagnosis history for various diseases. Using data  
52  
53 23 from both databases, we generated dichotomous variables for whether a participant had ever  
54  
55  
56  
57  
58  
59  
60

1  
2  
3 1 been diagnosed with the following diseases: asthma, arthritis, any cancer, cardiovascular diseases  
4  
5 2 (including angina, coronary heart disease, myocardial infarction, or stroke), diabetes, and  
6  
7 3 emphysema. NHIS had data on chronic obstructive pulmonary disease (COPD) available for  
8  
9 4 2013 through 2015 MEPS panels. From MEPS, we obtained scores for the Short Form 12 to  
10  
11 5 measure quality of life<sup>22</sup>, the Personal Health Questionnaire (PHQ) metric for depression<sup>23</sup>, and  
12  
13 6 the Kessler 6 questionnaire for mental illness<sup>24</sup>. From these variables, we were able to code a  
14  
15 7 partial list of comorbidities that Elixhauser and colleagues<sup>25</sup> suggest controlling for when using  
16  
17 8 administrative medical data.  
18  
19  
20  
21  
22  
23

#### 24 10 *Regression Analysis*

25  
26 11 We used the two-stage model approach developed by Manning and Basu<sup>17</sup> to model discrete-  
27  
28 12 continuous outcomes. The first regression in this method models whether or not an individual  
29  
30 13 had any medical expenditures in the given year. Then, the second model estimates the costs for  
31  
32 14 individuals who the first model predicted had any costs. We used an ordinary least squares  
33  
34 15 (OLS) logistic probit regression in the first step, followed by a generalized linear model with a  
35  
36 16 generalized Gamma distribution and log link in the second stage. We used the Stata twopm  
37  
38 17 command developed by Belotti and colleagues to execute the two models<sup>26</sup>. The twopm  
39  
40 18 command allowed us to use the survey weights provided by AHRQ. Data were collected and  
41  
42 19 merged using SAS v9.4 analytical software [SAS Institute, Cary, NC]. Data management was  
43  
44 20 performed in SAS and Stata IC v15 [Stata Corp, College Station, TX]. All data analysis was  
45  
46 21 conducted using Stata.  
47  
48  
49  
50  
51  
52  
53  
54  
55  
56  
57  
58  
59  
60

1  
2  
3 1 Our main regression model (Model 1) included personal characteristics and current smoking  
4  
5 2 status. We experimented with including body mass index in the model; however, the variable had  
6  
7 3 near 50% missingness, so we excluded it from our final model. (Further sensitivity analysis  
8  
9 4 indicated that body mass had negligible impact on estimated expenditures by smoking status).  
10  
11 5 We added the disease history to the two-stage model (Model 2). Finally, because COPD  
12  
13 6 comorbidity was only available for the last three years of the study, we excluded COPD and re-  
14  
15 7 ran the model on all five years of the study period. Because controlling for this co-morbidity did  
16  
17 8 not noticeably affect the estimates by smoking status, we chose to report estimates based on 5  
18  
19 9 years of data, thus increasing our power to probe costs among subgroups. We further expanded  
20  
21 10 Model 2 to include data on years-since-quit for Former smokers at 1-, 2-, and 5-year  
22  
23 11 thresholds. Because prevalence of these risk factors changes over the life course, we also  
24  
25 12 examined the marginal effects of smoking on medical expenditures by decade of adult life<sup>26</sup>.  
26  
27 13 Non-overlapping confidence intervals indicated statistically significant differences.  
28  
29  
30  
31  
32  
33  
34

## 35 **Results**

36  
37 16 An average of 19.7 million adults self-identified as Current smokers in the US from 2011 to  
38  
39 17 2015. The proportion of current smokers decreased over the study period, to approximately 17.5  
40  
41 18 million adults in 2015. An average of 43.6 million adults in the U.S. were Ever smokers. The  
42  
43 19 proportion of former smokers increased through decades of life, peaking over 22% for those  
44  
45 20 older than 70-years-old. Tables 1a and 1b describe smoking status by study year and decade of  
46  
47 21 life, respectively. Among the 23.9 million Former smokers, only 4.3% quit within the prior year,  
48  
49 22 8.7% quit within the prior 2 years, and 24.4% quit within the 5 years prior to the survey.  
50  
51  
52  
53  
54  
55  
56  
57  
58  
59  
60

1  
2  
3 1 Table 2 displays the costs for American adults in 2011 – 2015 by smoking status. In Model 1,  
4  
5 2 mean annual medical expenditures for US adults were \$4,830. Costs for adult Never smokers  
6  
7 3 were below the national average (\$4,360). Former smokers had the highest annual medical  
8  
9 4 expenses, \$5,590 (28% increase over never smokers). Although Current smokers had lower  
10  
11 5 average costs than Former smokers at \$5,144 (18% increase over Never smokers), the 95%  
12  
13 6 confidence intervals (CIs) overlap for Current and Former smokers. If we combine Current and  
14  
15 7 Former smokers into Ever smokers and re-run Model 1, the average costs for someone who has  
16  
17 8 ever smoked is \$5,400 (95% CI = 5142 – 5659).  
18  
19  
20  
21  
22  
23

24 10 In Table 3, a sensitivity analysis for Model 2 that includes years-since-quitting for former  
25  
26 11 smokers does not find a direct relationship between time since smoking cessation and medical  
27  
28 12 expenditures. The mean expenditures by cessation period have small differences, and the 95%  
29  
30 13 CIs greatly overlap. Table 4 identifies displays how medical expenditures vary across decades of  
31  
32 14 life by smoking status. The 95% CIs for Never smokers in Table 4 do not contain the estimate  
33  
34 15 for Former smokers at each decade. The CIs for Former smokers do not contain the estimate for  
35  
36 16 Never smokers at all decades except for age 20. The 95% CIs for Current smokers at each decade  
37  
38 17 include both the Never and Former smoker estimates, and the CIs for Never and Former smokers  
39  
40 18 include the estimate for Current smokers.  
41  
42  
43  
44  
45  
46

47 20 Multiplying costs by average number of smokers for 2011 – 2015, Current smokers incurred  
48  
49 21 \$101.4 billion in average annual medical expenses (95% CI = 12.6 billion – 14.1 billion), \$15  
50  
51 22 billion above the costs for a demographically comparable number of Never smokers. Former  
52  
53 23 smokers incurred an average of \$133.6 billion in annual medical expenditures (95% CI = 9.28  
54  
55  
56  
57  
58  
59  
60

1 billion – 110 billion), a \$29 billion increase over comparable Never smokers. Average annual  
2 medical expenditures for Ever smokers are \$235.6 billion (95% CI = 224 billion – 247 billion),  
3 approximately \$45 billion above the costs for a demographically comparable number of Never  
4 smokers.

## 6 Discussion

7 We updated the national estimates for smoking costs in American adults through 2015 using  
8 state-of-the-science economic modeling techniques. This was a period when major provisions of  
9 the ACA were being enacted, e.g., state Medicaid expansion; the “individual mandate” in 2014.<sup>7</sup>  
10 Our estimates for annual medical expenditures for all civilian non-institutionalized adults was  
11 \$4,830 for 2011 – 2015, in 2015 USD. This estimate for the study period was close to Mitchell  
12 and Machlin’s<sup>27</sup> estimate of average total medical expenditures in 2015 using MEPS data  
13 (\$4,978). Our estimate for annual expenditures and marginal costs due to smoking are below  
14 similar estimates generated using the National Health Expenditure Assessment (NHEA)  
15 database<sup>28 29</sup>. However, the NHEA is more comprehensive than the MEPS in capturing Medicaid  
16 costs covering institutionalized adults (including those in nursing homes), active-duty military,  
17 and foreign visitors to the US <sup>29 30</sup>, so we expected MEPS to yield lower estimates.

18  
19 We find that Former smokers have greater annual medical costs over Current and Never  
20 smokers; however, the 95% confident intervals overlap for Current and Former smokers in the  
21 main model. Surely, some smokers quit after diagnosis of costly health problems linked to  
22 smoking, but the cost differential narrows only slightly after controlling for major chronic

1 conditions (many of which are linked to smoking). Especially at younger ages, quitting appears  
2 to be more likely to sort smokers by health consciousness and associated use of medical care.

3  
4 Some older studies compared medical spending per capita among current, former, and never  
5 smokers. Using data from the 1987 National Medical Expenditure Survey (NMES), Miller and  
6 colleagues [1999] identified higher annual medical expenditures in former smokers over current  
7 smokers. Contrasting with the national studies, two studies using local claims data<sup>31 32</sup> found that  
8 medial expenditures for current and former smokers were nearly identical, with a slight spike in  
9 costs for former smokers immediately following quitting.

10  
11 Some current smokers may experience very high cost medical expenditures over a short period  
12 before dying (and thus not incurring any further costs), while former smokers may continue to  
13 amass lower cost medical encounters. These former smokers would be gaining up to 10 years of  
14 survival and medical expenditures over current smokers<sup>33</sup>. Current smokers also may simply be  
15 doctor-phobic, anxious to avoid yet another lecture about their smoking. The persistence and  
16 perversity of our finding that higher medical expenditures in former smokers at all ages and  
17 regardless of time-since-quit, suggests exploring the issue using qualitative methods.

18  
19 We followed the methods of Xu and colleagues<sup>5</sup> and Max and colleagues<sup>8-10</sup> to identify current,  
20 former, and never smokers in NHIS/MEPS data. Those studies examined attributable fractions  
21 (AFs) for medical expenditures rather than costs to individuals. The two-part model developed  
22 by Manning and colleagues has become the gold-standard for estimating costs in a skewed  
23 sample, such as medical expenditures<sup>17 34</sup>. It has been used to study the impact of smoking on

1 healthcare costs across a wide variety of databases<sup>6 35 36</sup>. An analysis from An<sup>6</sup> using the two-  
2 stage model was performed on medical expenditures associated with smoking status (ever vs.  
3 never) and obesity ( $< 30$  BMI vs.  $30 \geq$  BMI) using MEPS data from 1998 to 2011. In contrast to  
4 the present study, An's estimated expenditures did not control for quit status, marital status,  
5 family income, family size, or pregnancy. Our estimated cost differences between ever/never  
6 smokers and obese/non-obese individuals (data not shown) were lower than in the An study. We  
7 believe that the inclusion of quit status and additional personal characteristics in the two-stage  
8 models increases the precision of our estimate over this prior study.

### 9 10 *Limitations and Strengths*

11 Many of the prior studies assessing the impact of behavioral risk factors on medical expenditures  
12 employ the traditional attributable fraction approach, which constructs costs from selected acute  
13 and chronic conditions related to the individual risk factors of interest. This method is  
14 appropriate unless a study echoes our aim to examine the marginal effects of the risk behaviors  
15 on costs to individuals. Using the two-part model<sup>17</sup>, our study provides a different assessment of  
16 medical expenditures than the attributable fraction method. Attributable fraction studies estimate  
17 the smoking-related medical costs incurred in treated diseases that resulted from smoking. The  
18 two-stage modelling approach instead looks at the overall medical spending of the smoking  
19 cohort. It can be strongly influenced by a difference in care-seeking propensity.

20  
21 Our estimates for prevalence of smoking (9%) are lower than those found in other surveillance  
22 studies. The Behavioral Risk Factor Surveillance System (BRFSS) identified 15% of American  
23 adults as current smokers in 2015<sup>37</sup>. This discrepancy between BRFSS and NHIS data may be

1 due to different modes of data collection. While BRFSS collects data through telephone surveys,  
2 NHIS collects data via within-household, in-person interviews. Unlike NHIS, BRFSS data  
3 collection is de-centralized as is the responsibility of each state health department.

4  
5 The goal of this study was to update medical expenditures for smoking to 2015. It was beyond  
6 the scope of the study to assess spending by type of medical service utilized. With sufficient  
7 budget, doing so might have allowed us to propose more hypotheses as to why certain risks had  
8 increased costs over others, as Sturm<sup>38</sup> did for obesity and problem drinking.

9  
10 In a period of low inflation, we chose to control for inflation in our multi-year analysis of  
11 expenditures by including dummy variables for MEPS year rather than using price adjusters that  
12 assume a fixed market basket of medical services. The dummy variables should account not only  
13 for year-to-year changes in costs, but for other endogenous temporal effects. Those effects  
14 include the many policy features of 2010's Affordable Care Act that went into effect from 2011  
15 to 2015<sup>7</sup>. Further analysis of the impacts of all components of the ACA on medical expenditures  
16 is warranted.

### 17 18 *Conclusion*

19 Our data are the most recent examination of medical expenditures nationwide across current  
20 smoking status. One clear application of our estimates is in computing the medical spending  
21 foregone because behavioral risk-takers have elevated risks of morbidity and mortality. Although  
22 tobacco cessation cause declines in chronic illness, early mortality, and associated costs, it  
23 appears they may not decrease annual medical expenditures per survivor. That finding suggests



1 studies of return on investment in smoking cessation that use attributable-fraction-based costs  
2 may yield skewed results.

#### 3 4 *Acknowledgement and Funding*

5 The research in this paper was conducted at the CFACT Data Center, and the support of AHRQ  
6 is acknowledged. The results and conclusions in this paper are those of the authors and do not  
7 indicate concurrence by AHRQ or the Department of Health and Human Services.  
8 Funding for this project was provided by NHLBI grant AN: 3421751 (Implementation of HIT-  
9 Enhanced Tobacco Treatment for Hospitalized Smokers) and NCI grant R01CA201873  
10 (Optimizing Tobacco Dependence Treatment in the Emergency Department).

#### 11 *Patient and Public Involvement- Cohort Description*

12 The data for this study were obtained from two datasets generated by the U.S. Department of  
13 Health and Human Services: The National Health Interview Survey (NHIS) and the Medical  
14 Expenditure Panel Survey (MEPS). Both surveys are samples of American adults that can be  
15 used to generate weighted estimates of medical care in the U.S. These pre-existing data were not  
16 identified to the researchers, so we could not contact them nor involve them in any aspect of the  
17 study design and analysis.

#### 18 *Data Sharing-*

19 Data used in this study are held by AHRQ and U.S. DHHS and were used by agreement with the  
20 researchers. Raw data used in this study cannot be shared.

#### 21 *Author contributions*

1  
2  
3 1 SLB, TRM, and DIS conceived of the study. DIS, GW, and TRM designed the analysis. DIS  
4  
5 2 conducted the analysis. DIS and BA wrote and edited drafts of the manuscript. All authors  
6  
7 3 provided input on the manuscript and approved of the final draft.  
8  
9

10 4 *Competing interests:*  
11

12 5 All authors state that they have no competing interests.  
13  
14  
15  
16  
17  
18  
19  
20  
21  
22  
23  
24  
25  
26  
27  
28  
29  
30  
31  
32  
33  
34  
35  
36  
37  
38  
39  
40  
41  
42  
43  
44  
45  
46  
47  
48  
49  
50  
51  
52  
53  
54  
55  
56  
57  
58  
59  
60

## 1           2 3           1   **References** 4 5           2 6 7

- 8           3   1. U.S. Department of Health and Human Services. The Health Consequences of Smoking—50  
9  
10          4        Years of Progress: A Report of the Surgeon General. Atlanta, GA: U.S. Department of  
11  
12          5        Health and Human Services, Centers for Disease Control and Prevention, National Center  
13  
14          6        for Chronic Disease Prevention and Health Promotion, Office on Smoking and Health,  
15  
16          7        2014.  
17  
18
- 19          8   2. Warner KE. Cost effectiveness of smoking-cessation therapies. *Pharmacoeconomics*  
20  
21                9        1997;11(6):538-49. doi: 10.2165/00019053-199711060-00003  
22  
23
- 24          10   3. LeBlanc ES, O'Connor E, Whitlock EP, et al. Effectiveness of primary care-relevant  
25  
26          11        treatments for obesity in adults: A systematic evidence review for the U.S. Preventive  
27  
28          12        Services Task Force. *Annals of Internal Medicine* 2011;155(7):434-47. doi:  
29  
30          13        10.7326/0003-4819-155-7-201110040-00006  
31  
32
- 33          14   4. Fleming MF, Mundt MP, French MT, et al. Brief physician advice for problem drinkers:  
34  
35          15        Long-term efficacy and benefit-cost analysis. *Alcohol Clin Exp Res* 2002;26(1):36-43.  
36  
37
- 38          16   5. Xu X, Bishop EE, Kennedy SM, et al. Annual healthcare spending attributable to cigarette  
39  
40          17        smoking: an update. *Am J Prev Med* 2015;48(3):326-33. doi:  
41  
42          18        10.1016/j.amepre.2014.10.012 [published Online First: 2014/12/17]  
43  
44
- 45          19   6. An R. Health care expenses in relation to obesity and smoking among U.S. adults by gender,  
46  
47          20        race/ethnicity, and age group: 1998-2011. *Public Health* 2015;129(1):29-36. doi:  
48  
49          21        10.1016/j.puhe.2014.11.003 [published Online First: 2014/12/30]  
50  
51  
52  
53  
54  
55  
56  
57  
58  
59  
60

- 1  
2  
3 1 7. French MT, Homer J, Gumus G, et al. Key provisions of the patient protection and Affordable  
4  
5 2 Care Act (ACA): A systematic review and presentation of early research findings. *Health*  
6  
7 3 *Services Research* 2016;51(5):1735-71. doi: 10.1111/1475-6773.12511  
8  
9  
10 4 8. Max W, Sung HY, Shi Y, et al. The cost of smoking in California. *Nicotine & Tobacco*  
11  
12 5 *Research* 2016;18(5):1222-9. doi: 10.1093/ntr/ntv123 [published Online First:  
13  
14 6 2015/07/15]  
15  
16  
17 7 9. Max W, Rice D, Sung H, et al. The economic burden of smoking in California. *Tob Control*  
18  
19 8 2004;13(3):264-67.  
20  
21 9 10. Max W, Sung H-Y, Shi Y, et al. The Cost of Smoking in California, 2009. San Francisco,  
22  
23 CA: Institute for Health & Aging, University of California, San Francisco, 2014.  
24  
25  
26 11 11. Rockhill B, Newman B, Weinberg C. Use and misuse of population attributable fractions.  
27  
28 12 *AJPH* 1998;88(1):15-19.  
29  
30  
31 13 12. Lavelle TA, Kent DM, Lundquist CM, et al. Patient variability seldom assessed in cost-  
32  
33 14 effectiveness studies. *Med Decis Making* 2018;38(4):487-94.  
34  
35  
36 15 13. Trogon JG, Finkelstein EA, Hoefler TJ. Research Brief: Use of econometric models to  
37  
38 16 estimate expenditure shares. *Health Services Research* 2008;43:4(4):1442- 52. doi:  
39  
40 17 10.1111/j.1475-6773.2007.00827.x  
41  
42  
43 18 14. Tangka FK, Trogon JG, Richardson LC, et al. Cancer treatment cost in the United States:  
44  
45 19 has the burden shifted over time? *Cancer* 2010;116(14):3477-84. doi:  
46  
47 20 10.1002/cncr.25150 [published Online First: 2010/06/22]  
48  
49  
50 21 15. Heidenreich PA, Trogon JG, Khavjou OA, et al. Forecasting the future of cardiovascular  
51  
52 22 disease in the United States: A policy statement from the American Heart Association.  
53  
54  
55  
56  
57  
58  
59  
60

- 1  
2  
3 1 *Circulation* 2011;123(8):933-44. doi: 10.1161/CIR.0b013e31820a55f5,  
4  
5 2 CIR.0b013e31820a55f5 [pii] [published Online First: 2011/01/26]  
6  
7  
8 3 16. Florence CS, Zhou C, Luo F, et al. The economic burden of prescription opioid overdose,  
9  
10 4 abuse, and dependence in the United States, 2013. *Medical Care* 2016;54(10):901-06.  
11  
12 5 doi: 10.1097/MLR.0000000000000625, 00005650-201610000-00002 [pii] [published  
13  
14 6 Online First: 2016/09/14]  
15  
16  
17 7 17. Manning WG, Basu A, Mullahy J. Generalized modeling approaches to risk adjustment of  
18  
19 8 skewed outcomes data. *Journal of Health Economics* 2005;24(3):465-88. doi:  
20  
21 9 10.1016/j.jhealeco.2004.09.011 [published Online First: 2005/04/07]  
22  
23  
24 10 18. Jackson CA, Manning WG, Jr., Wells KB. Impact of prior and current alcohol use on use of  
25  
26 11 services by patients with depression and chronic medical illnesses. *Health Serv Res*  
27  
28 12 1995;30(5):687-705. [published Online First: 1995/12/01]  
29  
30  
31 13 19. Butler CC, Pill R, Stott NCH. Qualitative study of patients' perceptions of doctors' advice to  
32  
33 14 quit smoking: implications for opportunistic health promotion. *BMJ*  
34  
35 15 1998;316(7148):1878-81. doi: 10.1136/bmj.316.7148.1878  
36  
37  
38 16 20. National Center for Health Statistics. National Health Interview Survey 2018 [Available  
39  
40 17 from: <https://www.cdc.gov/nchs/nhis/index.htm>.  
41  
42  
43 18 21. Agency for Healthcare Research and Quality. Medical Expenditure Panel Survey 2018  
44  
45 19 [Available from: <https://meps.ahrq.gov/mepsweb/>.  
46  
47 20 22. Sengupta N, Nichol MB, Wu J, et al. Mapping the SF-12 to the HUI3 and VAS in a Managed  
48  
49 21 Care Population. *Medical Care* 2004;42(9):927-37. doi:  
50  
51 22 10.1097/01.mlr.0000135812.52570.42  
52  
53  
54  
55  
56  
57  
58  
59  
60

- 1  
2  
3 1 23. Arroll B, Goodyear-Smith F, Crengle S, et al. Validation of PHQ-2 and PHQ-9 to screen for  
4  
5 2 major depression in the primary care population. *Ann Fam Med* 2010;8(4):348-53. doi:  
6  
7 3 10.1370/afm.1139 [published Online First: 2010/07/21]  
8  
9  
10 4 24. Kessler RC, Barker PR, Colpe LJ, et al. Screening for serious mental illness in the general  
11  
12 5 population. *Archives of General Psychiatry* 2003;60(2):184-89. doi:  
13  
14 6 10.1001/archpsyc.60.2.184  
15  
16  
17 7 25. Elixhauser A, Steiner C, Harris D, et al. Comorbidity measures for use with administrative  
18  
19 8 data. *Medical Care* 1998;36(1):8-27.  
20  
21  
22 9 26. Belotti F, Deb P, Manning WG, et al. twopm: Two-part models. *Stata J* 2015;15(1):3-20.  
23  
24 10 27. Mitchell E, Machlin S. Concentration of health expenditures and selected characteristics of  
25  
26 11 high spenders, U.S. civilian noninstitutionalized population, 2015. Statistical Brief #506.  
27  
28 12 Rockville, MD: Agency for Healthcare Research and Quality, 2017.  
29  
30  
31 13 28. Lassman D, Hartman M, Washington B, et al. US health spending trends by age and gender:  
32  
33 14 Selected years 2002–10. *Health Affairs* 2014;33(5):815-22.  
34  
35  
36 15 29. Finkelstein EA, Trogon JG, Cohen JW, et al. Annual medical spending attributable to  
37  
38 16 obesity: Payer-and service-specific estimates. *Health Aff* 2009;28(5):w822-w31. doi:  
39  
40 17 10.1377/hlthaff.28.5.w822 [published Online First: 2009/07/29]  
41  
42  
43 18 30. Sing M, Banthin JS, Selden TM, et al. Reconciling medical expenditure estimates from the  
44  
45 19 MEPS and NHEA, 2002. *Health Care Financing Review* 2006;28(1):25-40.  
46  
47  
48 20 31. Fishman PA, Khan ZM, Thompson EE, et al. Health care costs among smokers, former  
49  
50 21 smokers, and never smokers in an HMO. *Health Services Research* 2003;38(2):733-49.  
51  
52 22 doi: 10.1111/1475-6773.00142  
53  
54  
55  
56  
57  
58  
59  
60

- 1  
2  
3 1 32. Hockenberry JM, Curry SJ, Fishman PA, et al. Healthcare costs around the time of smoking  
4  
5 2 cessation. *Am J Prev Med* 2012;42(6):596-601. doi: 10.1016/j.amepre.2012.02.019  
6  
7  
8 3 33. Jha P, Ramasundarahettige C, Landsman V, et al. 21st-century hazards of smoking and  
9  
10 4 benefits of cessation in the United States. *New England J Med* 2013;368(4):341-50. doi:  
11  
12 5 10.1056/NEJMsa1211128 [published Online First: 2013/01/25]  
13  
14  
15 6 34. Buntin MB, Zaslavsky AM. Too much ado about two-part models and transformation?  
16  
17 7 Comparing methods of modeling Medicare expenditures. *Journal of Health Economics*  
18  
19 8 2004;23(3):525-42.  
20  
21  
22 9 35. Coughlan D, Yeh ST, O'Neill C, et al. Evaluating direct medical expenditures estimation  
23  
24 10 methods of adults using the medical expenditure panel survey: An example focusing on  
25  
26 11 head and neck cancer. *Value Health* 2014;17(1):90-7. doi: 10.1016/j.jval.2013.10.004  
27  
28 12 [published Online First: 2014/01/21]  
29  
30  
31 13 36. Baumeister SE, Böger CA, Krämer BK, et al. Effect of chronic kidney disease and comorbid  
32  
33 14 conditions on health care costs: A 10-year observational study in a general population.  
34  
35 15 *Am J Nephrol* 2010;31(3):222-29.  
36  
37  
38 16 37. Jamal A, King B, Neff L, et al. Current cigarette smoking among adults—United States,  
39  
40 17 2005–2015. *MMWR* 2016;65:1205–11. doi: <http://dx.doi.org/10.15585/mmwr.mm6544a2>  
41  
42  
43 18 38. Sturm R. The effects of obesity, smoking, and drinking on medical problems and costs.  
44  
45 19 *Health Affairs* 2002;21(2):245-53.  
46  
47 20  
48  
49  
50  
51  
52  
53  
54  
55  
56  
57  
58  
59  
60

1 **Table 1.** Prevalence of smoking by year of MEPS data collection (a) and decade of age (b).  
 2 Average participants in each category were developed using survey weights.

| Table 1a | Smoking status by year of medical expenditure |       |       |       |       | n           |
|----------|-----------------------------------------------|-------|-------|-------|-------|-------------|
|          | 2011                                          | 2012  | 2013  | 2014  | 2015  |             |
| Current  | 7.7%                                          | 8.7%  | 8.4%  | 7.9%  | 7.3%  | 19,716,719  |
| Never    | 83.7%                                         | 81.6% | 81.6% | 81.6% | 82.4% | 206,862,703 |
| Former   | 8.6%                                          | 9.7%  | 10.0% | 10.5% | 10.3% | 23,900,571  |
| Table 1b | Smoking status by decade of life              |       |       |       |       |             |
|          | 18-30                                         | 31-40 | 41-50 | 51-60 | 61-70 | 70+         |
| Current  | 6.8%                                          | 9.8%  | 9.2%  | 9.6%  | 7.4%  | 4.4%        |
| Never    | 90.5%                                         | 83.2% | 83.8% | 79.8% | 76.8% | 73.3%       |
| Former   | 2.7%                                          | 7.0%  | 7.1%  | 10.6% | 15.7% | 22.3%       |



**Table 2.** Results of the two-part model for smoking status on mean medical expenditures per year, 2011 – 2015, in 2015 US\$. Model 1 included smoking and personal characteristics only <sup>a</sup>. Model 2 included personal characteristics, smoking, and comorbidities <sup>b</sup>. (CI = Confidence interval)

|                | Model 1   |                 | Model 2   |                 |
|----------------|-----------|-----------------|-----------|-----------------|
|                | Mean cost | 95% CI          | Mean cost | 95% CI          |
| Never Smoker   | \$4,360   | 4154.3 - 4566.3 | \$4,499   | 4219.6 - 4778.9 |
| Current Smoker | \$5,144   | 4707.9 - 5580.3 | \$4,647   | 4186.9 - 5107.0 |
| Former Smoker  | \$5,590   | 5267.4 - 5913.5 | \$5,012   | 4618.4 - 5406.4 |

<sup>a</sup> Covariates included in Model 1 were age (continuous), gender, race/ethnicity (White, African American, Asian, Hispanic origin, Other), education (No high school degree, High school or some college, At least college graduate), marital status (Single/Never married, Current married, Widowed/Divorced/Separated), Pregnancy in the prior year, employment status (Unemployed, Employed, Full-time student, Never worked, Retired), logged-total family income, insurance status (Private, Any public insurance (under age 65), Medicare/Medicaid+, Uninsured), family size, year dummy variables, any binge drinking in the prior year, and BMI (Normal weight or Underweight, Overweight or Obese).

<sup>b</sup> In addition to the variables in Model 1, a history of the following conditions were added to Model 2: any cancer, diabetes, asthma, arthritis, cardiovascular disease (angina, coronary heart disease, myocardial infarction, or stroke), emphysema, quality of life calculated from Short Form 12, depression calculated from the Personal Health Questionnaire, and mental illness from the Kessler 6 questionnaire.

1 **Table 3.** Results of separate runs of the two-part model of mean medical expenditures for  
2 Former smokers using 1-, 2-, and 5-year thresholds for years-since-quitting smoking. (CI =  
3 Confidence interval) in 2015 US\$.

| Years since quitting | Mean    | 95% CI          |
|----------------------|---------|-----------------|
| 1 or fewer years     | \$5,036 | 3604.4 - 6646.6 |
| More than 1 year     | \$5,006 | 4588.8 - 5422.3 |
| 2 or fewer years     | \$5,132 | 4035.0 - 6229.6 |
| More than 2 years    | \$4,986 | 4543.6 - 5429.1 |
| 5 or fewer years     | \$4,957 | 4182.8 - 5730.7 |
| More than 5 years    | \$5,028 | 4551.1 - 5505.2 |

4  
5  
6  
7  
8  
9  
10  
11  
12  
13  
14  
15  
16  
17  
18  
19  
20  
21  
22  
23  
24  
25  
26  
27  
28  
29  
30  
31  
32  
33  
34  
35  
36  
37  
38  
39  
40  
41  
42  
43  
44  
45  
46  
47  
48  
49  
50  
51  
52  
53  
54  
55  
56  
57  
58  
59  
60

For peer review only

**Table 4.** Average annual medical expenditures in 2011 – 2015 for American adults of selected ages by smoking status, from a two-part model including personal characteristics and disease history at each decade of life ages 20 – 80, in 2015 US\$.

| Smoking status | Age      |              |          |              |          |              |          |              |
|----------------|----------|--------------|----------|--------------|----------|--------------|----------|--------------|
|                | 20       |              | 30       |              | 40       |              | 50       |              |
|                | Estimate | 95% CI       |
| Never          | \$2,743  | (2366, 3151) | \$3,214  | (2857, 3571) | \$3,763  | (3472, 4054) | \$4,401  | (4160, 4642) |
| Current        | \$2,909  | (2390, 3428) | \$3,413  | (2928, 3897) | \$4,000  | (3561, 4438) | \$4,683  | (4284, 5081) |
| Former         | \$3,208  | (2704, 3711) | \$3,754  | (3301, 4208) | \$4,390  | (3947, 4783) | \$5,130  | (4776, 5483) |
| Smoking status | Age      |              |          |              |          |              |          |              |
|                | 60       |              | 70       |              | 80       |              |          |              |
|                | Estimate | 95% CI       | Estimate | 95% CI       | Estimate | 95% CI       |          |              |
| Never          | \$5,143  | (4846, 5440) | \$6,007  | (5505, 6508) | \$7,010  | (6184, 7836) |          |              |
| Current        | \$5,478  | (5059, 5897) | \$6,403  | (5839, 6968) | \$7,479  | (6627, 8331) |          |              |
| Former         | \$5,990  | (5574, 6407) | \$6,990  | (6357, 7623) | \$8,153  | (7160, 9145) |          |              |

4

**CHEERS Checklist**

**Items to include when reporting economic evaluations of health interventions**

The ISPOR CHEERS Task Force Report, *Consolidated Health Economic Evaluation Reporting Standards (CHEERS)—Explanation and Elaboration: A Report of the ISPOR Health Economic Evaluations Publication Guidelines Good Reporting Practices Task Force*, provides examples and further discussion of the 24-item CHEERS Checklist and the CHEERS Statement. It may be accessed via the *Value in Health* or via the ISPOR Health Economic Evaluation Publication Guidelines – CHEERS: Good Reporting Practices webpage: <http://www.ispor.org/TaskForces/EconomicPubGuidelines.asp>

| Section/item                    | Item No | Recommendation                                                                                                                                                                             | Reported on page No/line No |
|---------------------------------|---------|--------------------------------------------------------------------------------------------------------------------------------------------------------------------------------------------|-----------------------------|
| <b>Title and abstract</b>       |         |                                                                                                                                                                                            |                             |
| Title                           | 1       | Identify the study as an economic evaluation or use more specific terms such as “cost-effectiveness analysis”, and describe the interventions compared.                                    | <u>Title Page</u>           |
| Abstract                        | 2       | Provide a structured summary of objectives, perspective, setting, methods (including study design and inputs), results (including base case and uncertainty analyses), and conclusions.    | <u>P1 Line 2-19</u>         |
| <b>Introduction</b>             |         |                                                                                                                                                                                            |                             |
| Background and objectives       | 3       | Provide an explicit statement of the broader context for the study.<br>Present the study question and its relevance for health policy or practice decisions.                               | <u>P1-2</u>                 |
| <b>Methods</b>                  |         |                                                                                                                                                                                            |                             |
| Target population and subgroups | 4       | Describe characteristics of the base case population and subgroups analysed, including why they were chosen.                                                                               | <u>P4 LG-16</u>             |
| Setting and location            | 5       | State relevant aspects of the system(s) in which the decision(s) need(s) to be made.                                                                                                       | <u>N/A</u>                  |
| Study perspective               | 6       | Describe the perspective of the study and relate this to the costs being evaluated.                                                                                                        | <u>P4 L7</u>                |
| Comparators                     | 7       | Describe the interventions or strategies being compared and state why they were chosen.                                                                                                    | <u>P4 11-16</u>             |
| Time horizon                    | 8       | State the time horizon(s) over which costs and consequences are being evaluated and say why appropriate.                                                                                   | <u>B-P4</u>                 |
| Discount rate                   | 9       | Report the choice of discount rate(s) used for costs and outcomes and say why appropriate.                                                                                                 | <u>P11 L16-21</u>           |
| Choice of health outcomes       | 10      | Describe what outcomes were used as the measure(s) of benefit in the evaluation and their relevance for the type of analysis performed.                                                    | <u>N/A</u>                  |
| Measurement of effectiveness    | 11a     | <i>Single study-based estimates:</i> Describe fully the design features of the single effectiveness study and why the single study was a sufficient source of clinical effectiveness data. | <u>N/A</u>                  |

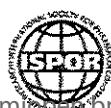

|    |                         |     |                                                                                                                                                                                                                                                                                                                                                                         |
|----|-------------------------|-----|-------------------------------------------------------------------------------------------------------------------------------------------------------------------------------------------------------------------------------------------------------------------------------------------------------------------------------------------------------------------------|
| 1  |                         |     |                                                                                                                                                                                                                                                                                                                                                                         |
| 2  |                         | 11b | <i>Synthesis-based estimates</i> : Describe fully the methods used for identification of included studies and synthesis of clinical effectiveness data. <u>N/A</u>                                                                                                                                                                                                      |
| 3  |                         |     |                                                                                                                                                                                                                                                                                                                                                                         |
| 4  |                         |     |                                                                                                                                                                                                                                                                                                                                                                         |
| 5  | Measurement and         | 12  | If applicable, describe the population and methods used to elicit preferences for outcomes. <u>N/A</u>                                                                                                                                                                                                                                                                  |
| 6  | valuation of preference |     |                                                                                                                                                                                                                                                                                                                                                                         |
| 7  | based outcomes          |     |                                                                                                                                                                                                                                                                                                                                                                         |
| 8  |                         |     |                                                                                                                                                                                                                                                                                                                                                                         |
| 9  | Estimating resources    | 13a | <i>Single study-based economic evaluation</i> : Describe approaches used to estimate resource use associated with the alternative interventions. Describe primary or secondary research methods for valuing each resource item in terms of its unit cost. Describe any adjustments made to approximate to opportunity costs. <u>—</u>                                   |
| 10 | and costs               |     |                                                                                                                                                                                                                                                                                                                                                                         |
| 11 |                         |     |                                                                                                                                                                                                                                                                                                                                                                         |
| 12 |                         | 13b | <i>Model-based economic evaluation</i> : Describe approaches and data sources used to estimate resource use associated with model health states. Describe primary or secondary research methods for valuing each resource item in terms of its unit cost. Describe any adjustments made to approximate to opportunity costs. <u>P4-6</u>                                |
| 13 |                         |     |                                                                                                                                                                                                                                                                                                                                                                         |
| 14 |                         |     |                                                                                                                                                                                                                                                                                                                                                                         |
| 15 |                         |     |                                                                                                                                                                                                                                                                                                                                                                         |
| 16 |                         |     |                                                                                                                                                                                                                                                                                                                                                                         |
| 17 |                         |     |                                                                                                                                                                                                                                                                                                                                                                         |
| 18 |                         |     |                                                                                                                                                                                                                                                                                                                                                                         |
| 19 |                         |     |                                                                                                                                                                                                                                                                                                                                                                         |
| 20 |                         |     |                                                                                                                                                                                                                                                                                                                                                                         |
| 21 |                         |     |                                                                                                                                                                                                                                                                                                                                                                         |
| 22 | Currency, price date,   | 14  | Report the dates of the estimated resource quantities and unit costs. Describe methods for adjusting estimated unit costs to the year of reported costs if necessary. Describe methods for converting costs into a common currency base and the exchange rate. <u>P11</u>                                                                                               |
| 23 | and conversion          |     |                                                                                                                                                                                                                                                                                                                                                                         |
| 24 |                         |     |                                                                                                                                                                                                                                                                                                                                                                         |
| 25 |                         |     |                                                                                                                                                                                                                                                                                                                                                                         |
| 26 |                         |     |                                                                                                                                                                                                                                                                                                                                                                         |
| 27 |                         |     |                                                                                                                                                                                                                                                                                                                                                                         |
| 28 | Choice of model         | 15  | Describe and give reasons for the specific type of decision-analytical model used. Providing a figure to show model structure is strongly recommended. <u>P2-3</u>                                                                                                                                                                                                      |
| 29 |                         |     |                                                                                                                                                                                                                                                                                                                                                                         |
| 30 |                         |     |                                                                                                                                                                                                                                                                                                                                                                         |
| 31 | Assumptions             | 16  | Describe all structural or other assumptions underpinning the decision-analytical model. <u>P2,3,6</u>                                                                                                                                                                                                                                                                  |
| 32 |                         |     |                                                                                                                                                                                                                                                                                                                                                                         |
| 33 |                         |     |                                                                                                                                                                                                                                                                                                                                                                         |
| 34 | Analytical methods      | 17  | Describe all analytical methods supporting the evaluation. This could include methods for dealing with skewed, missing, or censored data; extrapolation methods; methods for pooling data; approaches to validate or make adjustments (such as half cycle corrections) to a model; and methods for handling population heterogeneity and uncertainty. <u>P2-6,10,11</u> |
| 35 |                         |     |                                                                                                                                                                                                                                                                                                                                                                         |
| 36 |                         |     |                                                                                                                                                                                                                                                                                                                                                                         |
| 37 |                         |     |                                                                                                                                                                                                                                                                                                                                                                         |
| 38 |                         |     |                                                                                                                                                                                                                                                                                                                                                                         |
| 39 |                         |     |                                                                                                                                                                                                                                                                                                                                                                         |
| 40 |                         |     |                                                                                                                                                                                                                                                                                                                                                                         |
| 41 | <b>Results</b>          |     |                                                                                                                                                                                                                                                                                                                                                                         |
| 42 | Study parameters        | 18  | Report the values, ranges, references, and, if used, probability distributions for all parameters. Report reasons or sources for distributions used to represent uncertainty where appropriate. Providing a table to show the input values is strongly recommended. <u>P7, T1</u>                                                                                       |
| 43 |                         |     |                                                                                                                                                                                                                                                                                                                                                                         |
| 44 |                         |     |                                                                                                                                                                                                                                                                                                                                                                         |
| 45 |                         |     |                                                                                                                                                                                                                                                                                                                                                                         |
| 46 |                         |     |                                                                                                                                                                                                                                                                                                                                                                         |
| 47 |                         |     |                                                                                                                                                                                                                                                                                                                                                                         |
| 48 | Incremental costs and   | 19  | For each intervention, report mean values for the main categories of estimated costs and outcomes of interest, as well as mean differences between the comparator groups. If applicable, report incremental cost-effectiveness ratios. <u>T1</u>                                                                                                                        |
| 49 | outcomes                |     |                                                                                                                                                                                                                                                                                                                                                                         |
| 50 |                         |     |                                                                                                                                                                                                                                                                                                                                                                         |
| 51 |                         |     |                                                                                                                                                                                                                                                                                                                                                                         |
| 52 | Characterising          | 20a | <i>Single study-based economic evaluation</i> : Describe the effects of sampling uncertainty for the estimated incremental cost and incremental effectiveness parameters, together with the impact <u>T2-4</u>                                                                                                                                                          |
| 53 | uncertainty             |     |                                                                                                                                                                                                                                                                                                                                                                         |
| 54 |                         |     |                                                                                                                                                                                                                                                                                                                                                                         |
| 55 |                         |     |                                                                                                                                                                                                                                                                                                                                                                         |
| 56 |                         |     |                                                                                                                                                                                                                                                                                                                                                                         |
| 57 |                         |     |                                                                                                                                                                                                                                                                                                                                                                         |
| 58 |                         |     |                                                                                                                                                                                                                                                                                                                                                                         |
| 59 |                         |     |                                                                                                                                                                                                                                                                                                                                                                         |
| 60 |                         |     |                                                                                                                                                                                                                                                                                                                                                                         |

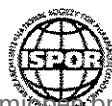

1  
2  
3  
4  
5  
6  
7  
8  
9  
10  
11  
12  
13  
14  
15  
16  
17  
18  
19  
20  
21  
22  
23  
24  
25  
26  
27  
28  
29  
30  
31  
32  
33  
34  
35  
36  
37  
38  
39  
40  
41  
42  
43  
44  
45  
46  
47  
48  
49  
50  
51  
52  
53  
54  
55  
56  
57  
58  
59  
60

|                                                                      |     |                                                                                                                                                                                                                                                                            |               |
|----------------------------------------------------------------------|-----|----------------------------------------------------------------------------------------------------------------------------------------------------------------------------------------------------------------------------------------------------------------------------|---------------|
|                                                                      |     | of methodological assumptions (such as discount rate, study perspective).                                                                                                                                                                                                  |               |
|                                                                      | 20b | <i>Model-based economic evaluation:</i> Describe the effects on the results of uncertainty for all input parameters, and uncertainty related to the structure of the model and assumptions.                                                                                |               |
| Characterising heterogeneity                                         | 21  | If applicable, report differences in costs, outcomes, or cost-effectiveness that can be explained by variations between subgroups of patients with different baseline characteristics or other observed variability in effects that are not reducible by more information. | <u>N/A</u>    |
| <b>Discussion</b>                                                    |     |                                                                                                                                                                                                                                                                            |               |
| Study findings, limitations, generalisability, and current knowledge | 22  | Summarise key study findings and describe how they support the conclusions reached. Discuss limitations and the generalisability of the findings and how the findings fit with current knowledge.                                                                          | <u>P45-11</u> |
| <b>Other</b>                                                         |     |                                                                                                                                                                                                                                                                            |               |
| Source of funding                                                    | 23  | Describe how the study was funded and the role of the funder in the identification, design, conduct, and reporting of the analysis. Describe other non-monetary sources of support.                                                                                        | <u>P12</u>    |
| Conflicts of interest                                                | 24  | Describe any potential for conflict of interest of study contributors in accordance with journal policy. In the absence of a journal policy, we recommend authors comply with International Committee of Medical Journal Editors recommendations.                          |               |

For consistency, the CHEERS Statement checklist format is based on the format of the CONSORT statement checklist

The **ISPOR CHEERS Task Force Report** provides examples and further discussion of the 24-item CHEERS Checklist and the CHEERS Statement. It may be accessed via the *Value in Health* link or via the ISPOR Health Economic Evaluation Publication Guidelines – CHEERS: Good Reporting Practices webpage: <http://www.ispor.org/TaskForces/EconomicPubGuidelines.asp>

The citation for the CHEERS Task Force Report is:

Husereau D, Drummond M, Petrou S, et al. Consolidated health economic evaluation reporting standards (CHEERS)—Explanation and elaboration: A report of the ISPOR health economic evaluations publication guidelines good reporting practices task force. *Value Health* 2013;16:231-50.

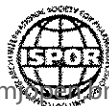

Supplement: bmjopen-2018-026592.draft_revisions.pdf [file bmjopen-2018-026592.draft_revisions.pdf]
